# Supplementary material for: Kinetic evolution of ZrO 2 -modified silicate-based glass sealants during sintering and crystallization in planar solid oxide fuel cells
Source: Royal Society of Chemistry journal article supplement (doi:10.1039/d5ra08813e), 2026-01-01
Supplement: d5ra08813e1.pdf [file d5ra08813e1.pdf]

## Supplementary Information

### **Kinetic evolution of ZrO<sub>2</sub>-modified silicate-based glass sealants during sintering and crystallization in planar solid oxide fuel cells**

Shuai Yuan<sup>a</sup>, Haozhen Li<sup>a</sup>, Hao Shi<sup>a</sup>, Yuxuan Fei<sup>a</sup>, Hengyong Tu<sup>a</sup>, Chao Ma<sup>b,\*</sup>, Lei Zhu<sup>a,\*</sup>, Zhen Huang<sup>a,b</sup>

<sup>a</sup>Key Laboratory for Power Machinery and Engineering of M.O.E., Shanghai Jiao Tong University, Shanghai 200240, China.

<sup>b</sup>College of Smart Energy, Shanghai Jiao Tong University, Shanghai 200240, China.

\* Corresponding authors

E-mail addresses: [chaoma99@sjtu.edu.cn](mailto:chaoma99@sjtu.edu.cn) (C. Ma), [tonyzhulei@sjtu.edu.cn](mailto:tonyzhulei@sjtu.edu.cn) (L. Zhu).

E-mail addresses: [chaoma99@sjtu.edu.cn](mailto:chaoma99@sjtu.edu.cn) (C. Ma), [tonyzhulei@sjtu.edu.cn](mailto:tonyzhulei@sjtu.edu.cn) (L. Zhu).

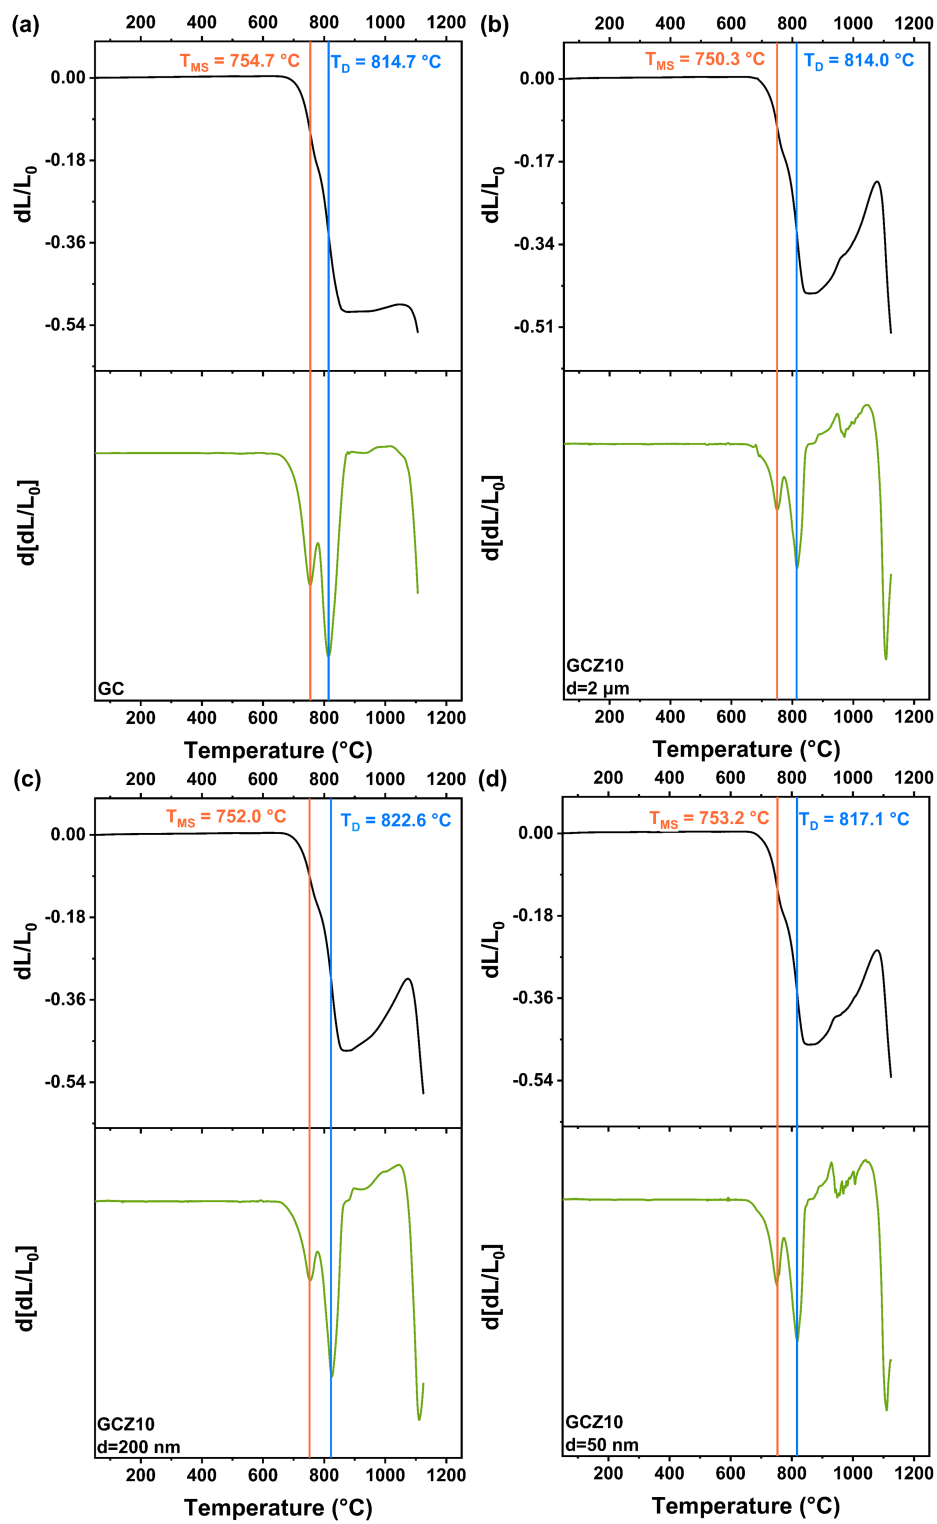

**Fig. S1** Sintering curves and the first derivative curves of the sintering curves for (a) GC, (b) GCZ10,  $d = 2\ \mu\text{m}$ , (c) GCZ10,  $d = 200\ \text{nm}$ , (d) GCZ10,  $d = 50\ \text{nm}$  samples.



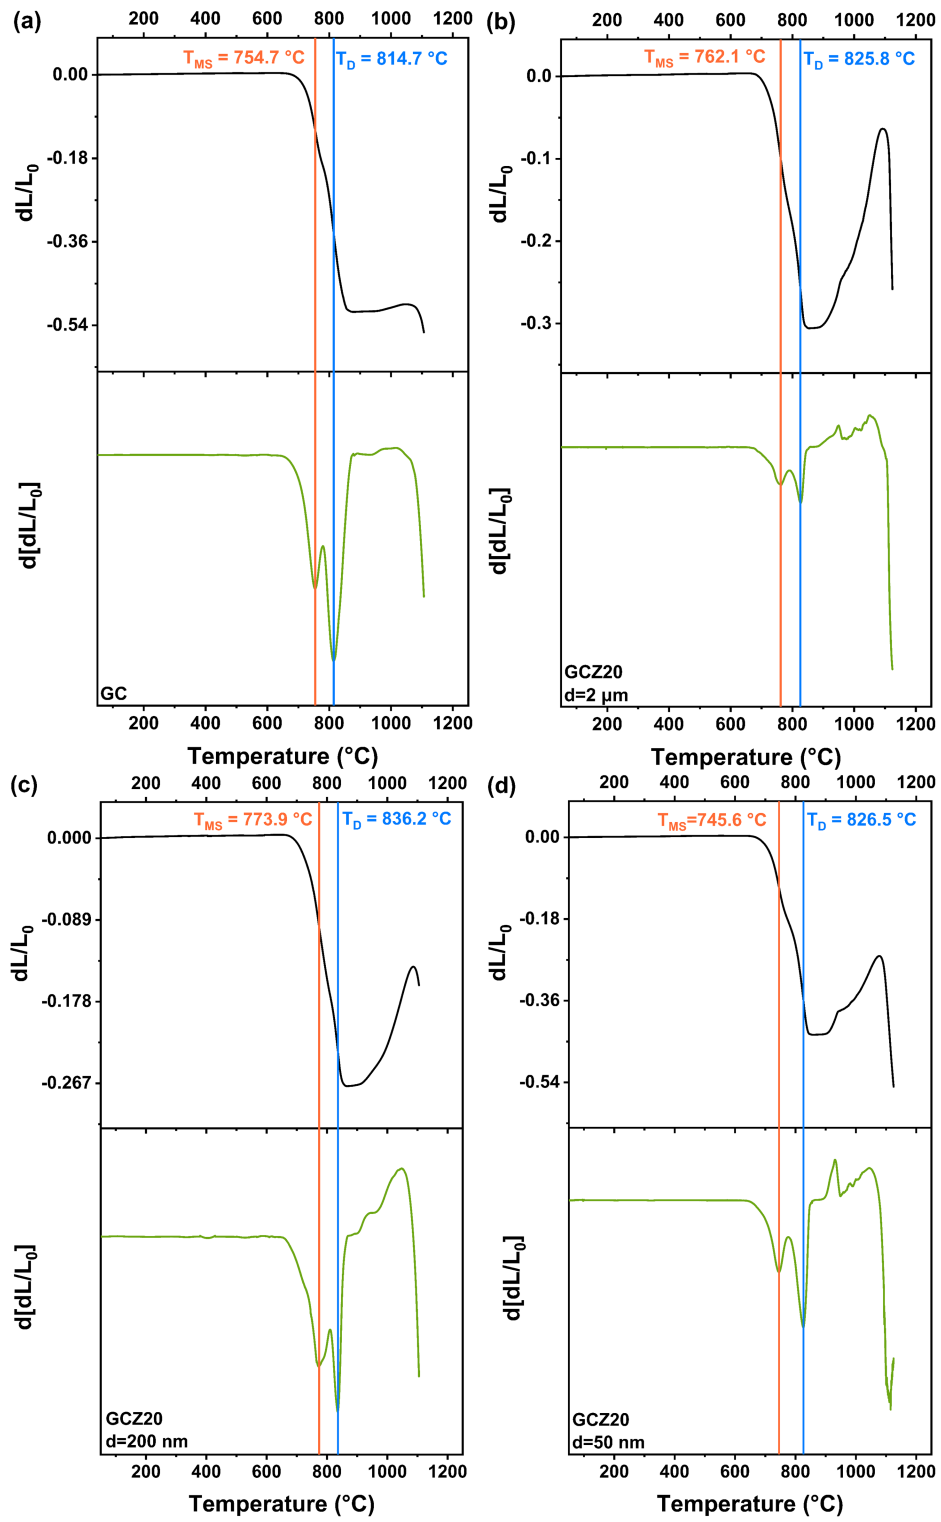

**Fig. S2** Sintering curves and the first derivative curves of the sintering curves for (a) GC, (b) GCZ20, d=2  $\mu$ m, (c) GCZ20, d=200 nm, (d) GCZ20, d=50 nm samples.

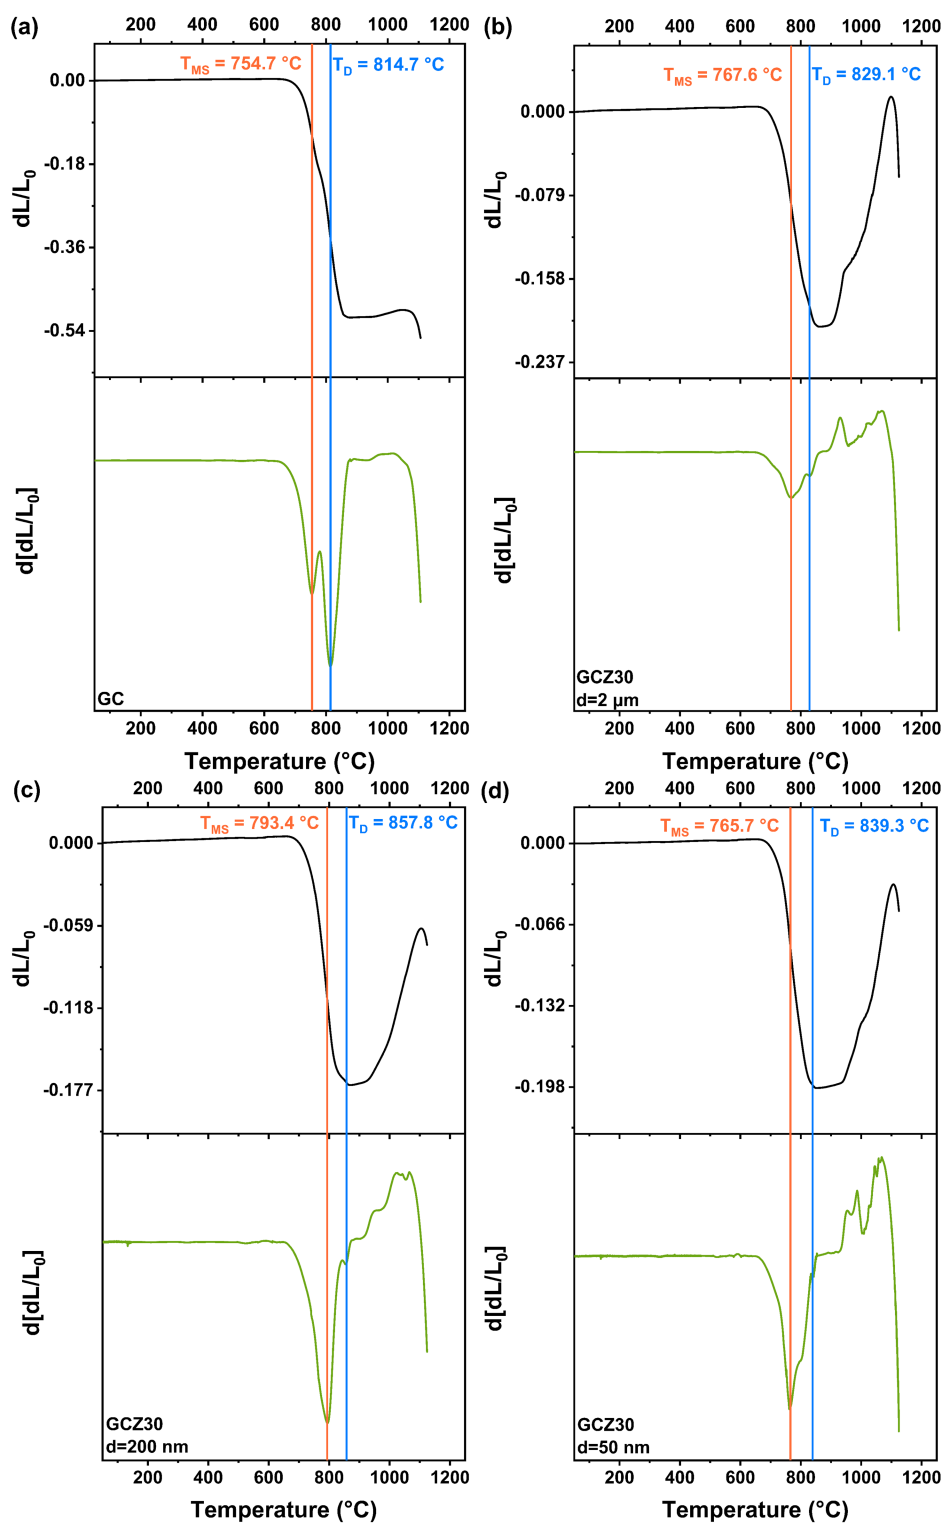

**Fig. S3** Sintering curves and the first derivative curves of the sintering curves for (a) GC, (b) GCZ30,  $d=2\text{ }\mu\text{m}$ , (c) GCZ30,  $d=200\text{ nm}$ , (d) GCZ30,  $d=50\text{ nm}$  samples.

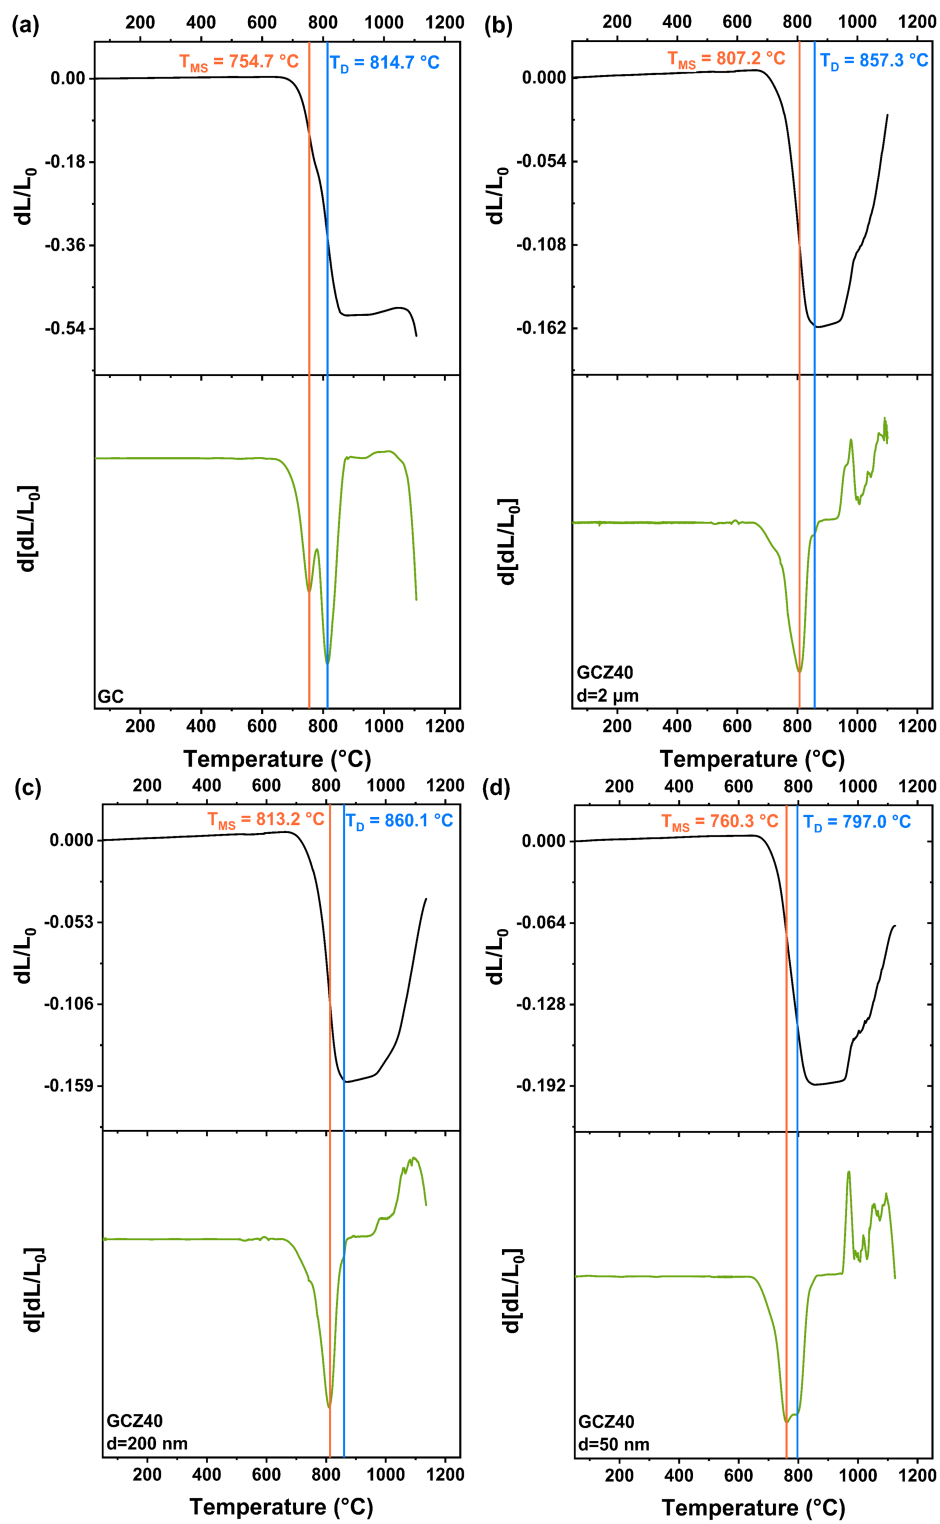

**Fig. S4** Sintering curves and the first derivative curves of the sintering curves for (a) GC, (b) GCZ40,  $d=2\text{ }\mu\text{m}$ , (c) GCZ40,  $d=200\text{ nm}$ , (d) GCZ40,  $d=50\text{ nm}$  samples.

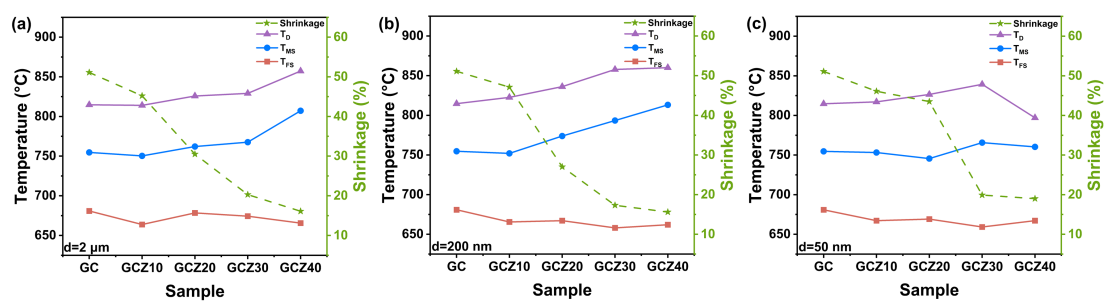

**Fig. S5** Characteristic temperature and shrinkage rate for different mass fraction of (a)  $2\ \mu\text{m}$   $\text{ZrO}_2$ , (b)  $200\ \text{nm}$   $\text{ZrO}_2$  and (c)  $50\ \text{nm}$   $\text{ZrO}_2$ .

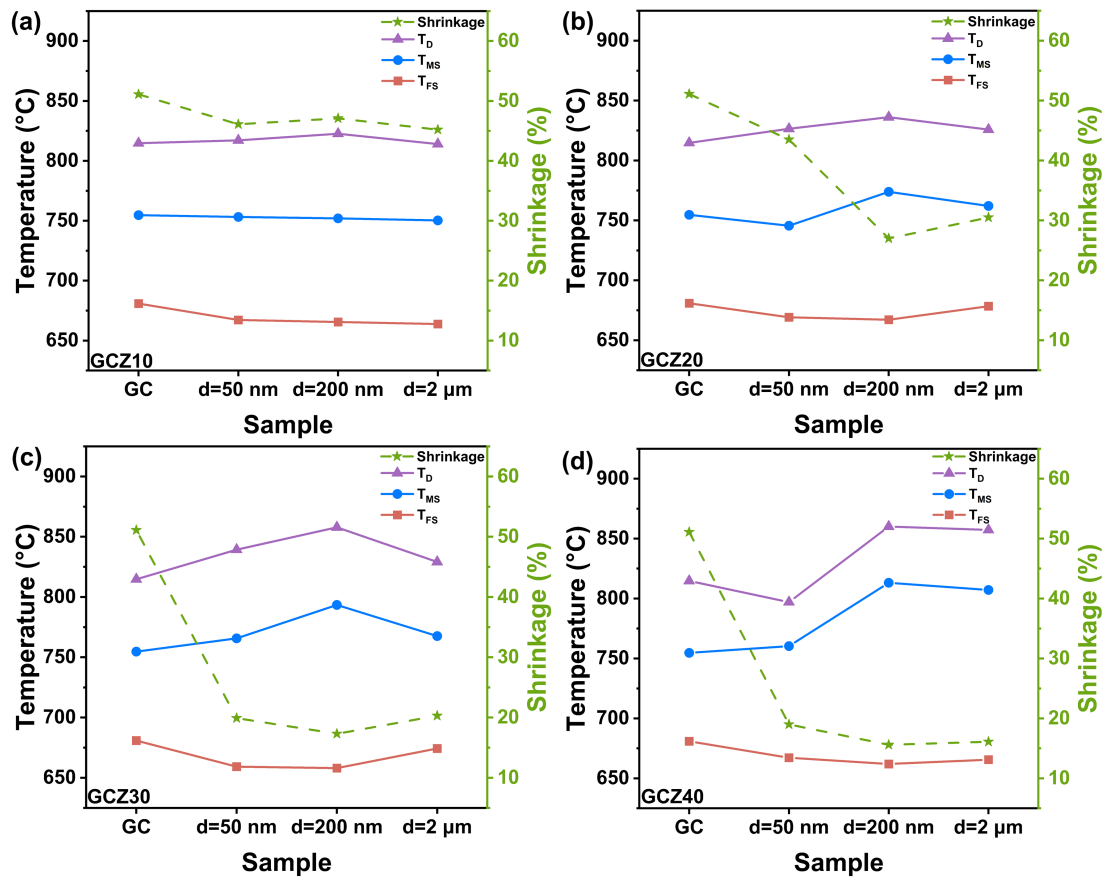

**Fig. S6** Characteristic temperature and shrinkage rate for different particle sizes of (a) GCZ10, (b) GCZ20, (c) GCZ30 and (d) GCZ40 samples.

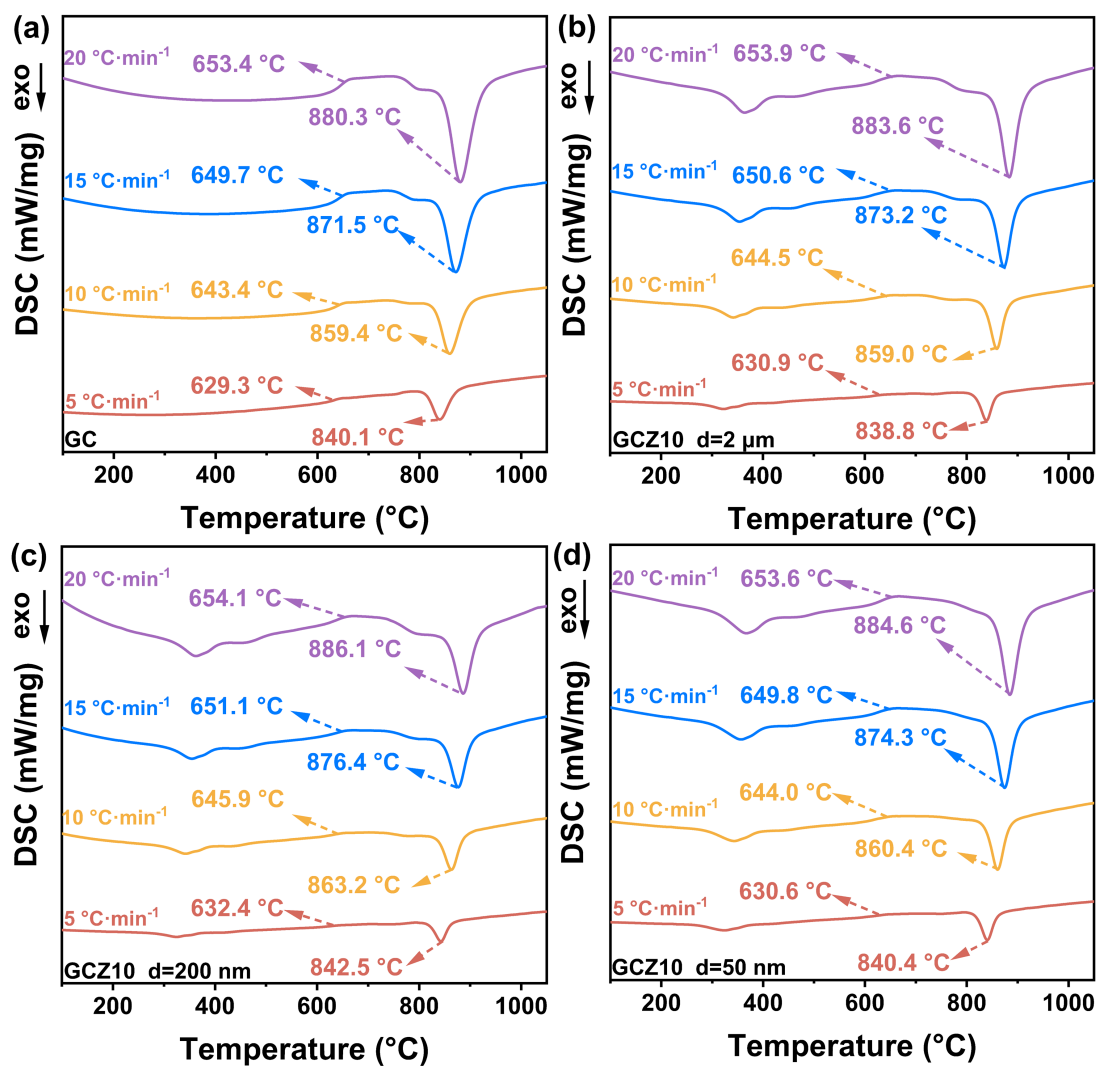

**Fig. S7** DSC Curves obtained at different heating rates ( $5^{\circ}\text{C}\cdot\text{min}^{-1}$ ,  $10^{\circ}\text{C}\cdot\text{min}^{-1}$ ,  $15^{\circ}\text{C}\cdot\text{min}^{-1}$ ,  $20^{\circ}\text{C}\cdot\text{min}^{-1}$ ) for (a) GC, (b) GCZ10, d=2  $\mu\text{m}$ , (c) GCZ10, d=200 nm, (d) GCZ10, d=50 nm samples.

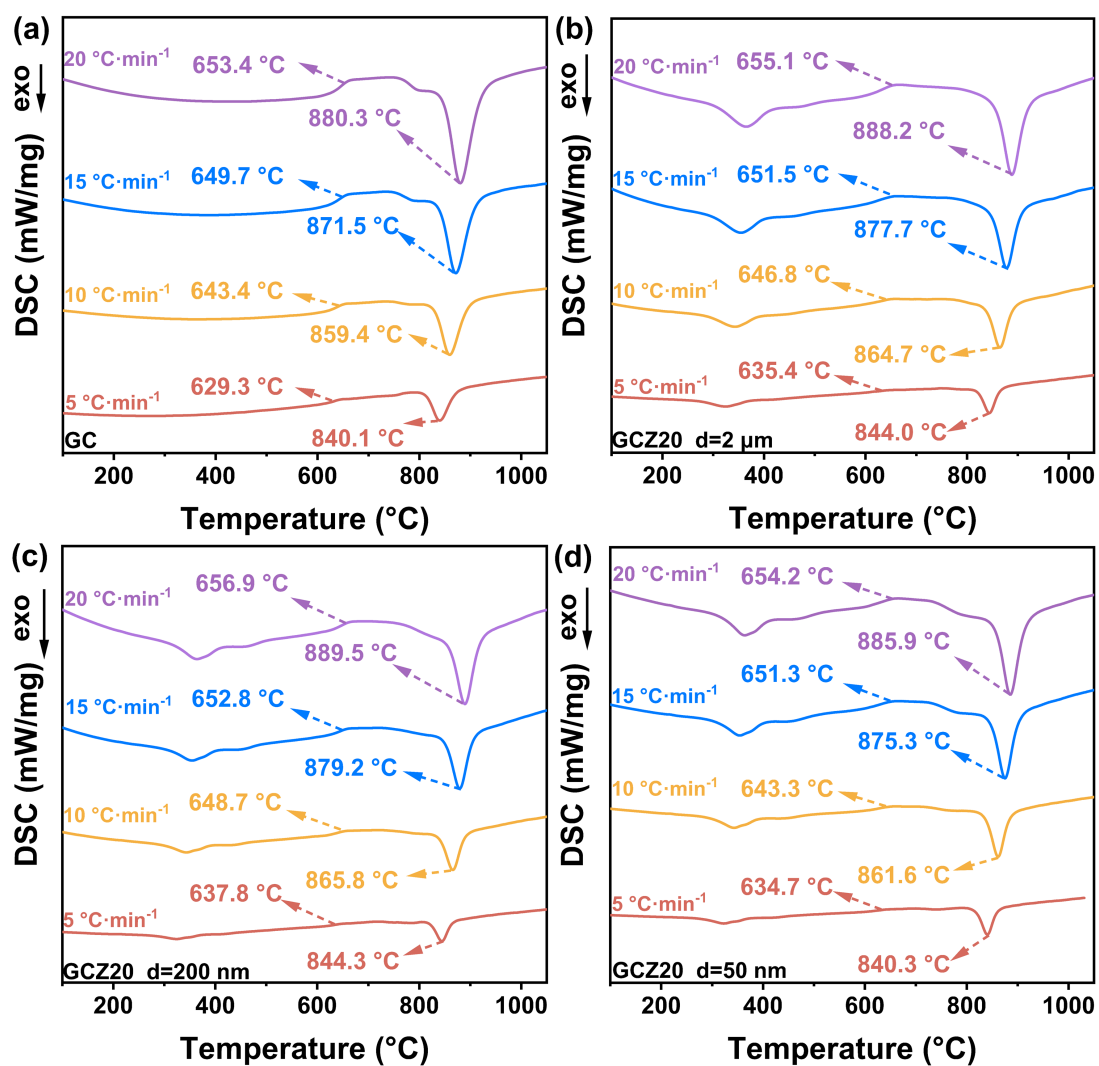

**Fig. S8** DSC Curves obtained at different heating rates (5 °C·min<sup>-1</sup>, 10 °C·min<sup>-1</sup>, 15 °C·min<sup>-1</sup>, 20 °C·min<sup>-1</sup>) for (a) GC, (b) GCZ20, d=2 μm, (c) GCZ20, d=200 nm, (d) GCZ20, d=50 nm samples.

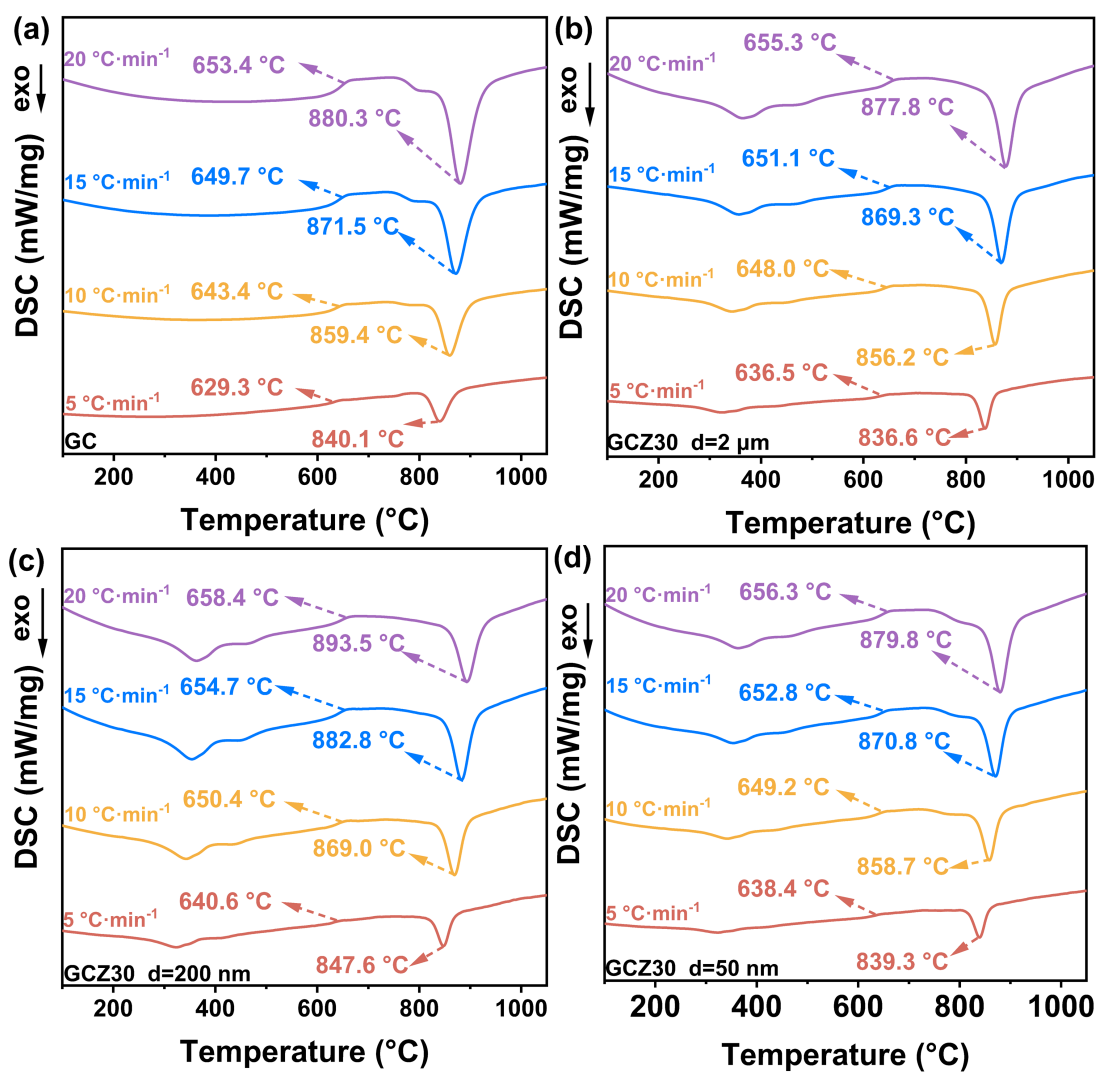

**Fig. S9** DSC Curves obtained at different heating rates (5 °C·min<sup>-1</sup>, 10 °C·min<sup>-1</sup>, 15 °C·min<sup>-1</sup>, 20 °C·min<sup>-1</sup>) for (a) GC, (b) GCZ30, d=2 μm, (c) GCZ30, d=200 nm, (d) GCZ30, d=50 nm samples.



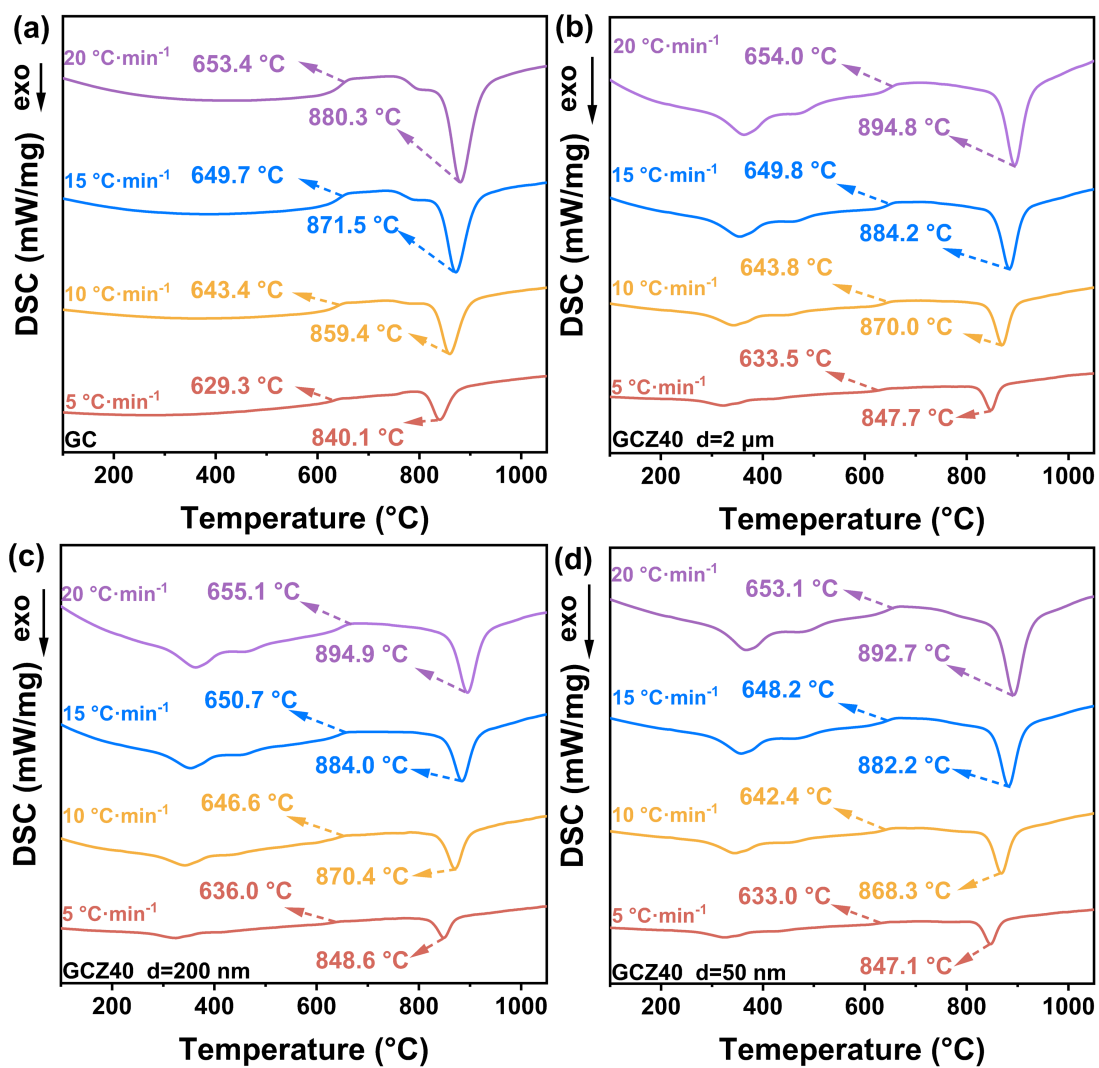

**Fig. S10** DSC Curves obtained at different heating rates ( $5^{\circ}\text{C}\cdot\text{min}^{-1}$ ,  $10^{\circ}\text{C}\cdot\text{min}^{-1}$ ,  $15^{\circ}\text{C}\cdot\text{min}^{-1}$ ,  $20^{\circ}\text{C}\cdot\text{min}^{-1}$ ) for (a) GC, (b) GCZ40, d=2  $\mu\text{m}$ , (c) GCZ40, d=200 nm, (d) GCZ40, d=50 nm samples.

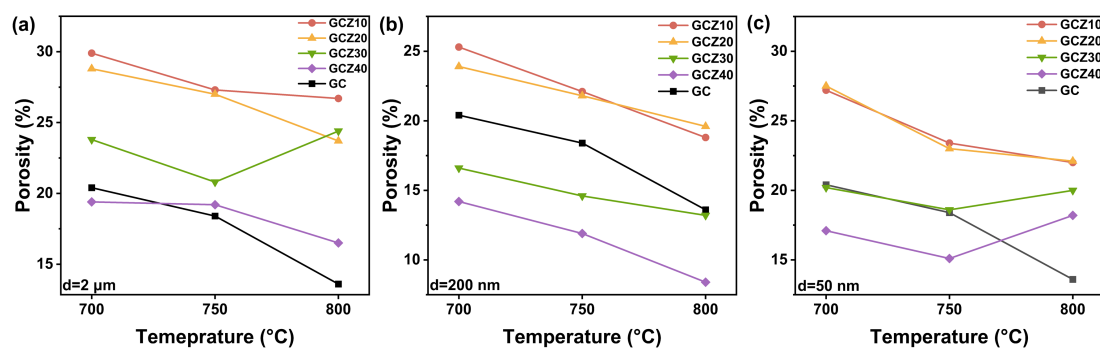

**Fig. S11** Porosity for different mass fraction of (a) 2  $\mu\text{m}$  ZrO<sub>2</sub>, (b) 200 nm ZrO<sub>2</sub> and (c) 50 nm ZrO<sub>2</sub> at 700 °C, 750 °C, and 800 °C.

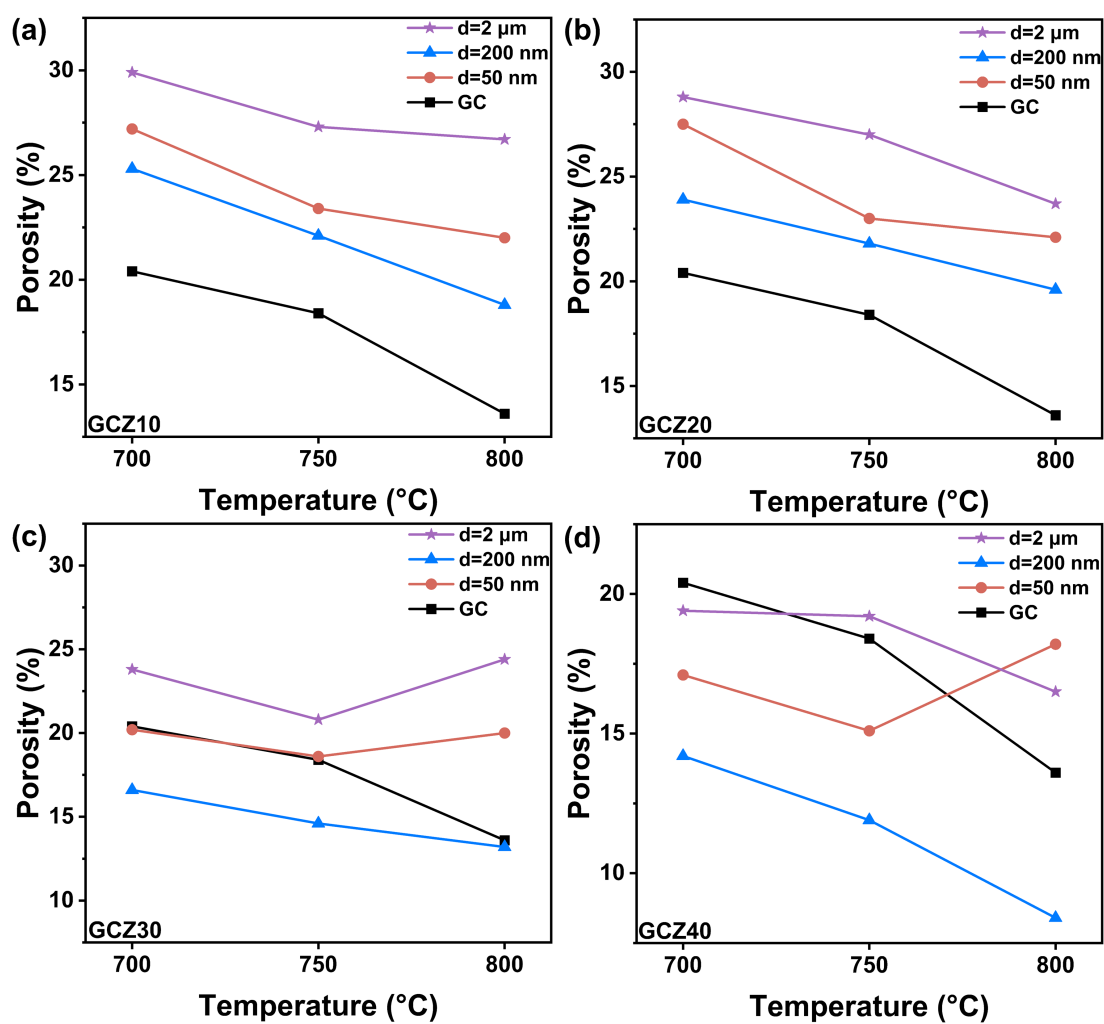

**Fig. S12** Porosity for different particle sizes of (a) GCZ10, (b) GCZ20, (c) GCZ30 and (d) GCZ40 samples at 700 °C, 750 °C, and 800 °C.

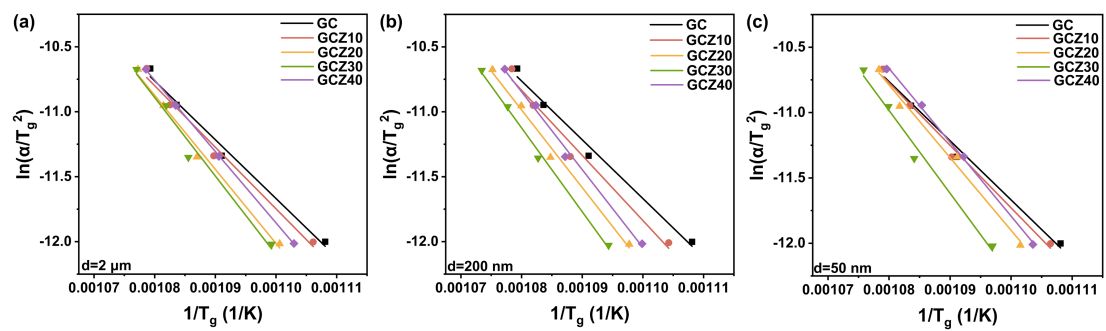

**Fig. S13** Plots of  $\ln(\alpha/T_g^2)$  versus  $1/T_g$  for different mass fraction of (a)  $2 \mu m$  ZrO<sub>2</sub>, (b)  $200 \text{ nm}$  ZrO<sub>2</sub> and (c)  $50 \text{ nm}$  ZrO<sub>2</sub>.

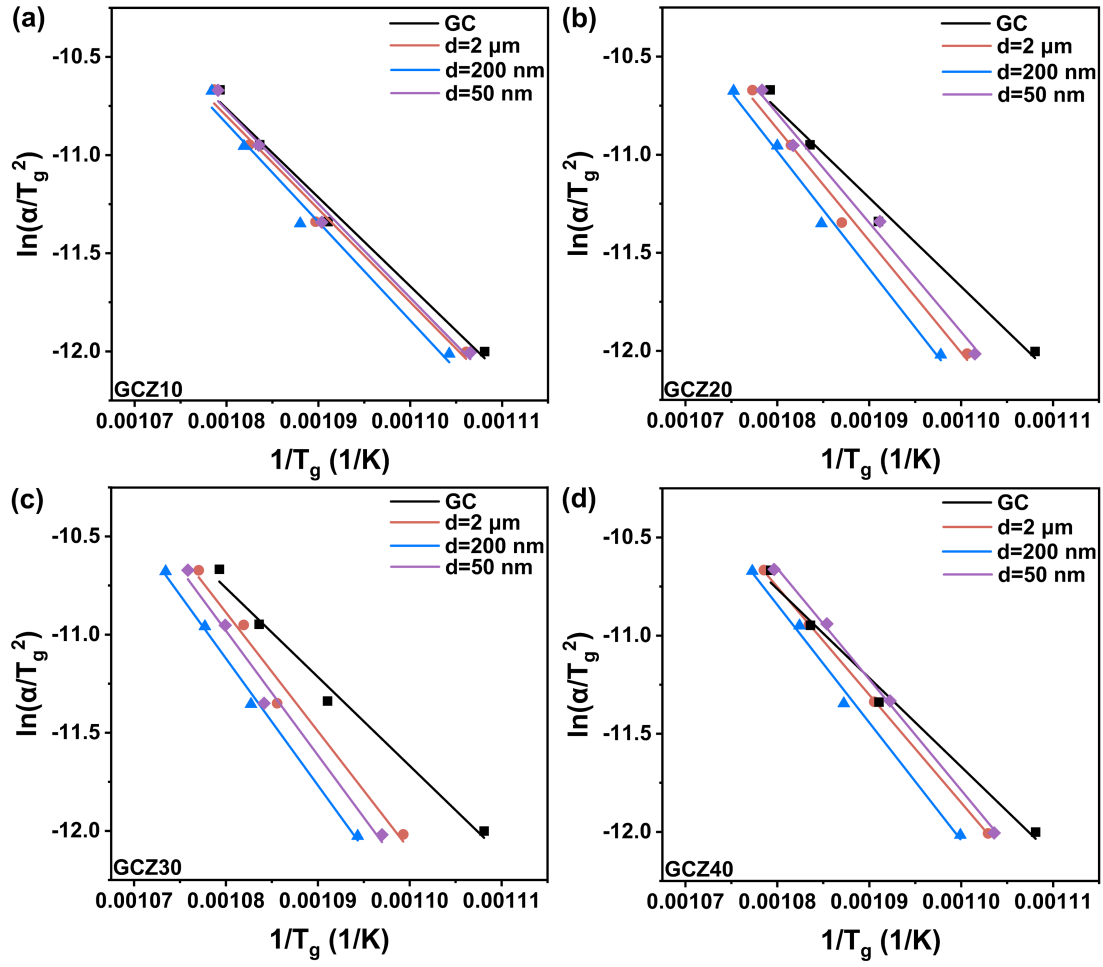

**Fig. S14** Plots of  $\ln(\alpha/T_g^2)$  versus  $1/T_g$  for different particle sizes of (a) GCZ10, (b) GCZ20, (c) GCZ30 and (d) GCZ40 samples.

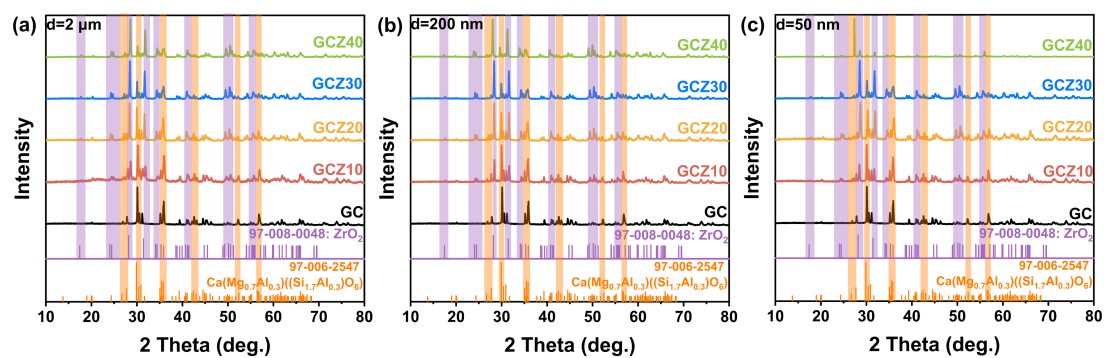

**Fig. S15** XRD patterns for different mass fraction of (a) 2 μm ZrO<sub>2</sub>, (b) 200 nm ZrO<sub>2</sub> and (c) 50 nm ZrO<sub>2</sub> after heat-treatment for 20 hours.

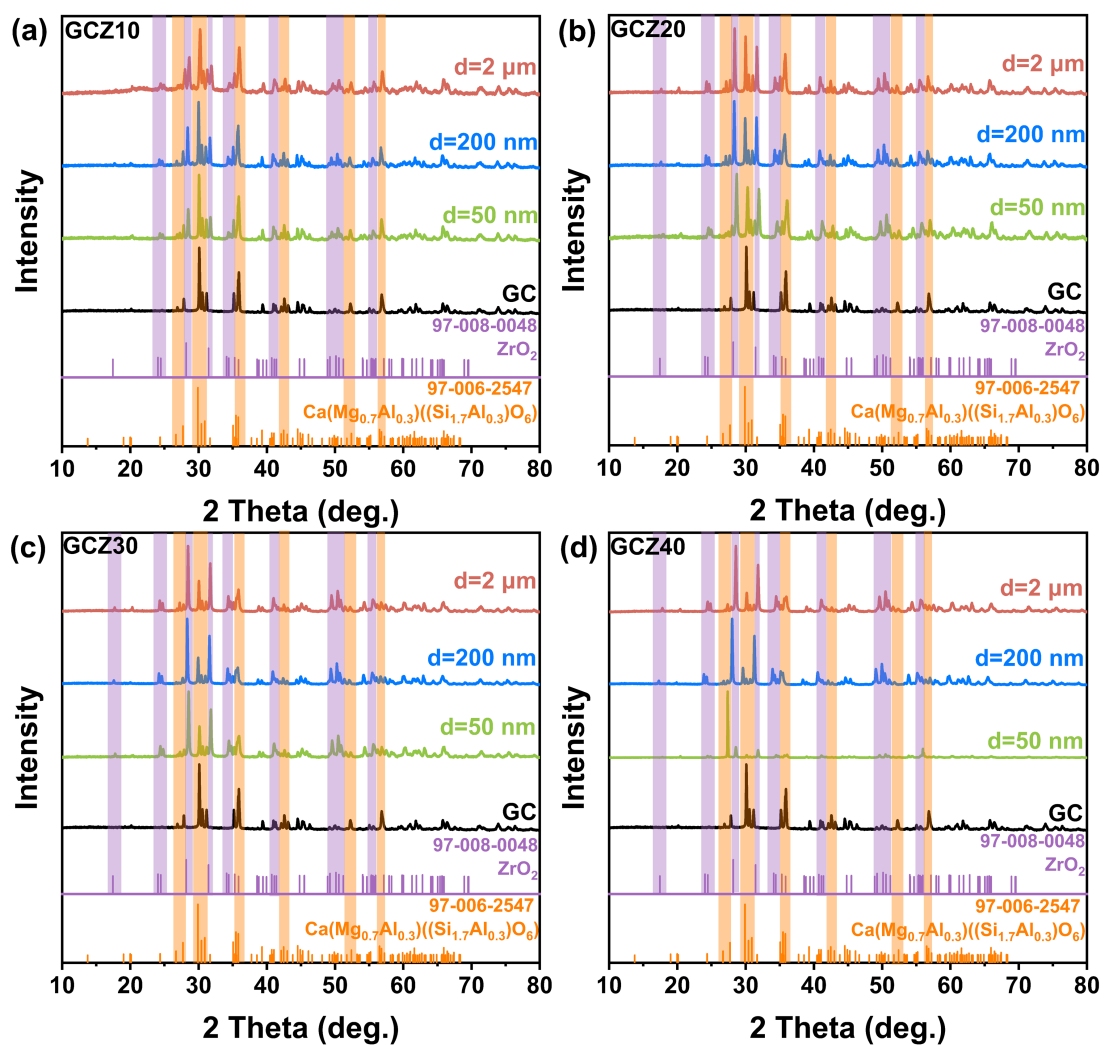

**Fig. S16** XRD patterns for different particle sizes of (a) GCZ10, (b) GCZ20, (c) GCZ30 and (d) GCZ40 samples after heat-treatment for 20 hours.

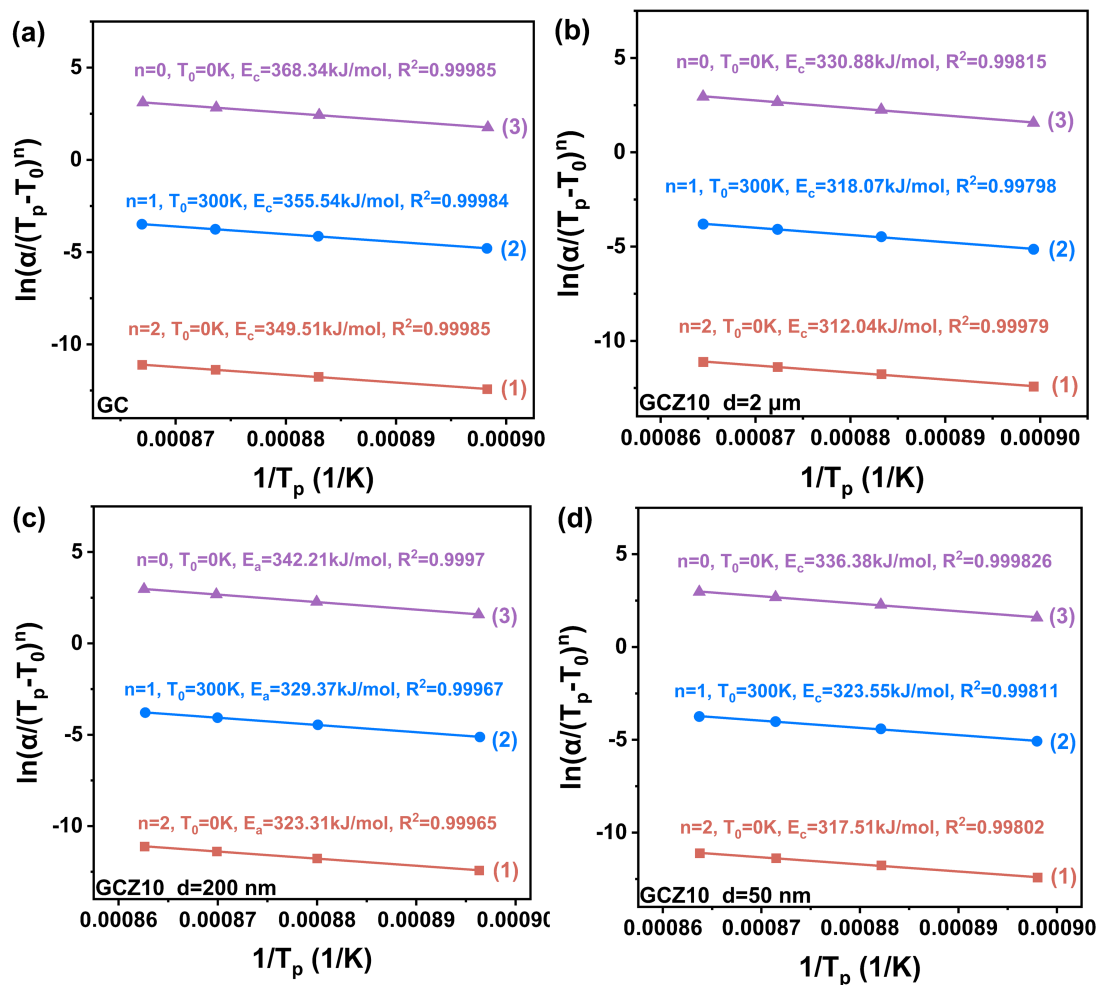

**Fig. S17** Plots of  $\ln(\alpha/(T_p - T_0)^n)$  versus  $1/T_p$  calculated based on (1) Kissinger model, (2) Augis-Bennett model and (3) Ozawa model for (a) GC, (b) GCZ10, d=2  $\mu\text{m}$ , (c) GCZ10, d=200 nm, (d) GCZ10, d=50 nm samples.



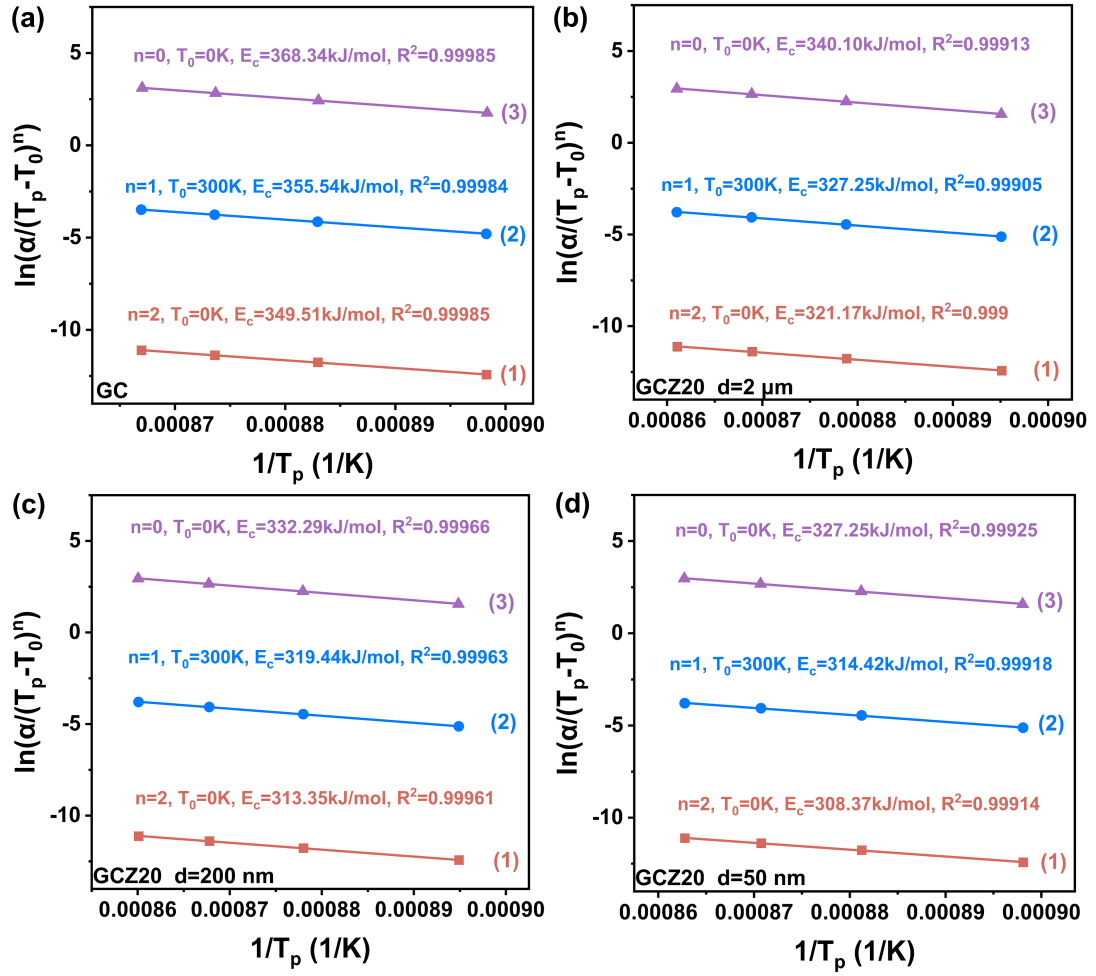

**Fig. S18** Plots of  $\ln(\alpha/(T_p - T_0)^n)$  versus  $1/T_p$  calculated based on (1) Kissinger model, (2) Augis-Bennett model and (3) Ozawa model for (a) GC, (b) GCZ20, d=2  $\mu m$ , (c) GCZ20, d=200 nm, (d) GCZ20, d=50 nm samples.

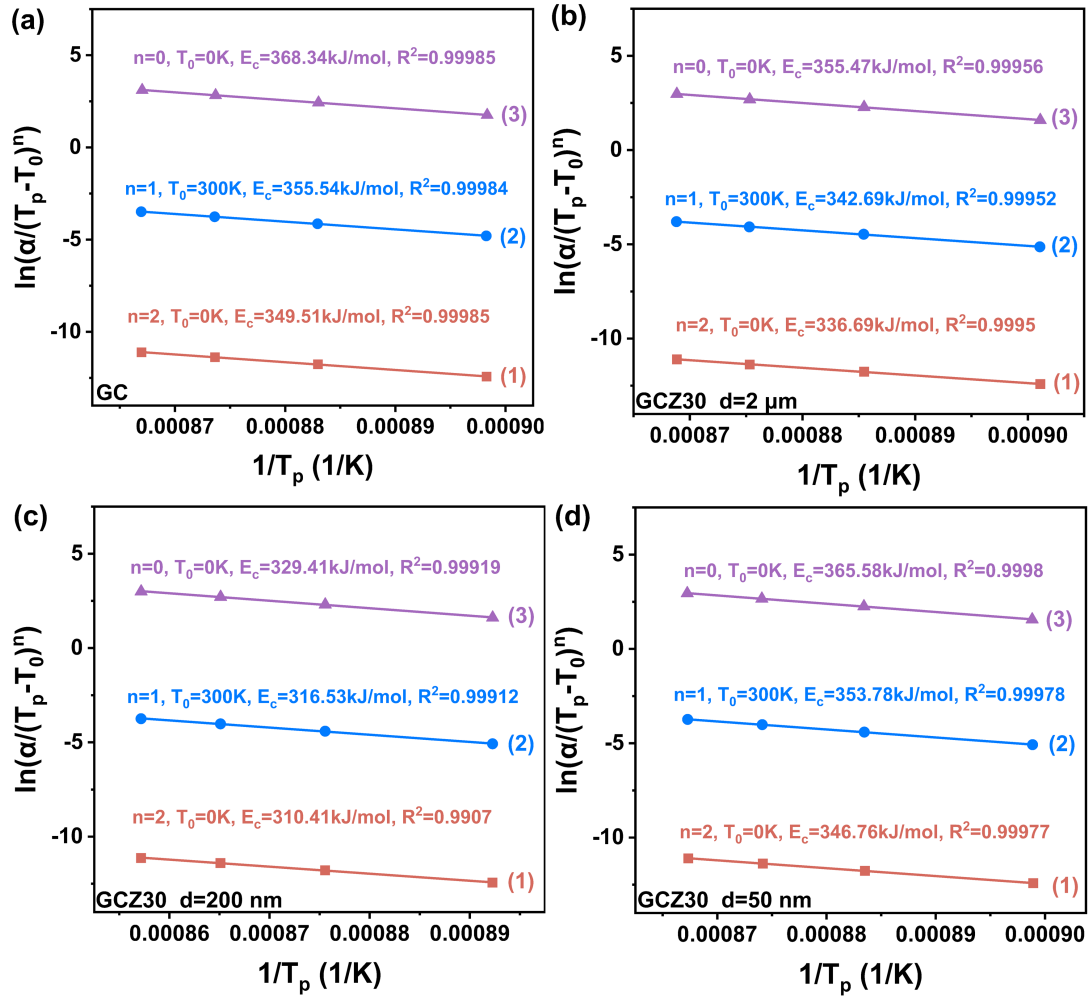

**Fig. S19** Plots of  $\ln(\alpha/(T_p - T_0)^n)$  versus  $1/T_p$  calculated based on (1) Kissinger model, (2) Augis-Bennett model and (3) Ozawa model for (a) GC, (b) GCZ30, d=2  $\mu$ m, (c) GCZ30, d=200 nm, (d) GCZ30, d=50 nm samples.

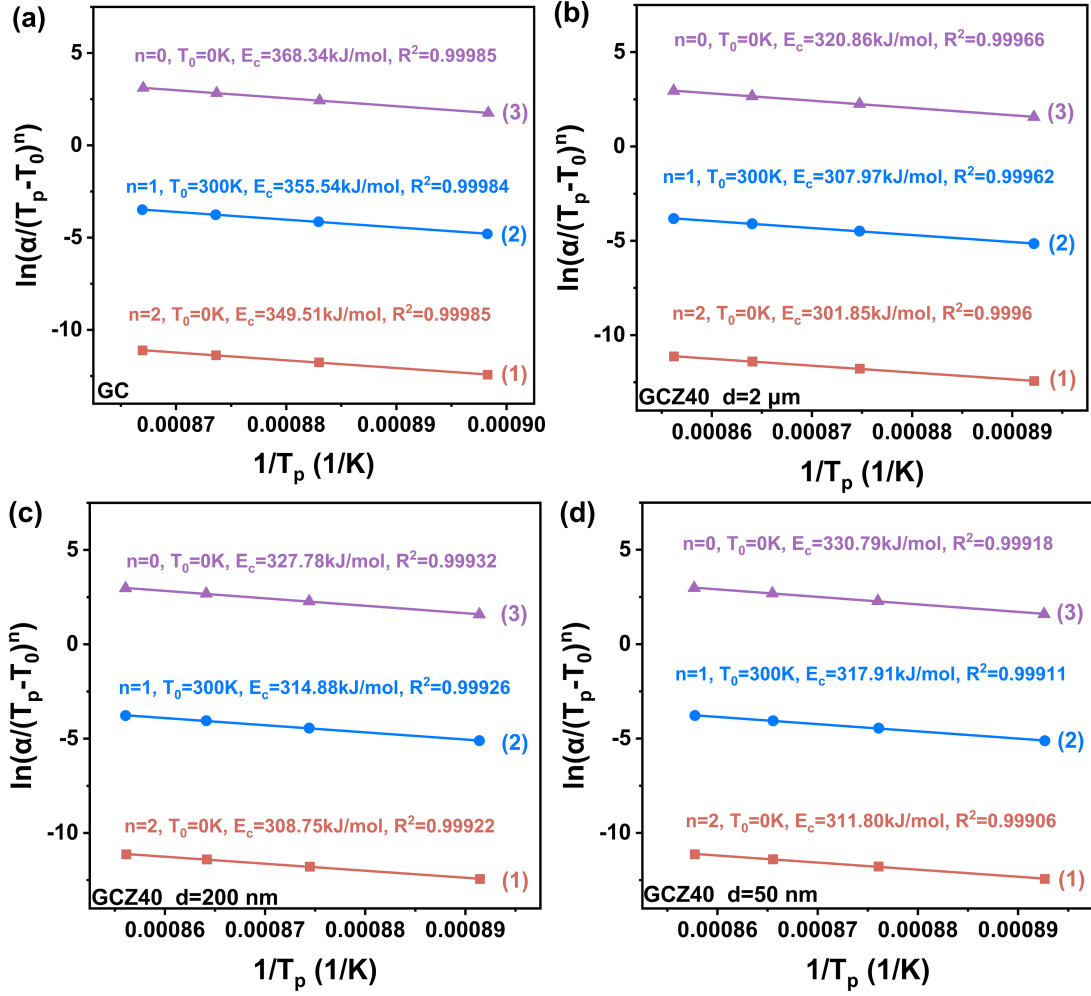

**Fig. S20** Plots of  $\ln(\alpha/(T_p - T_0)^n)$  versus  $1/T_p$  calculated based on (1) Kissinger model, (2) Augis-Bennett model and (3) Ozawa model for (a) GC, (b) GCZ40, d=2  $\mu$ m, (c) GCZ40, d=200 nm, (d) GCZ40, d=50 nm samples.

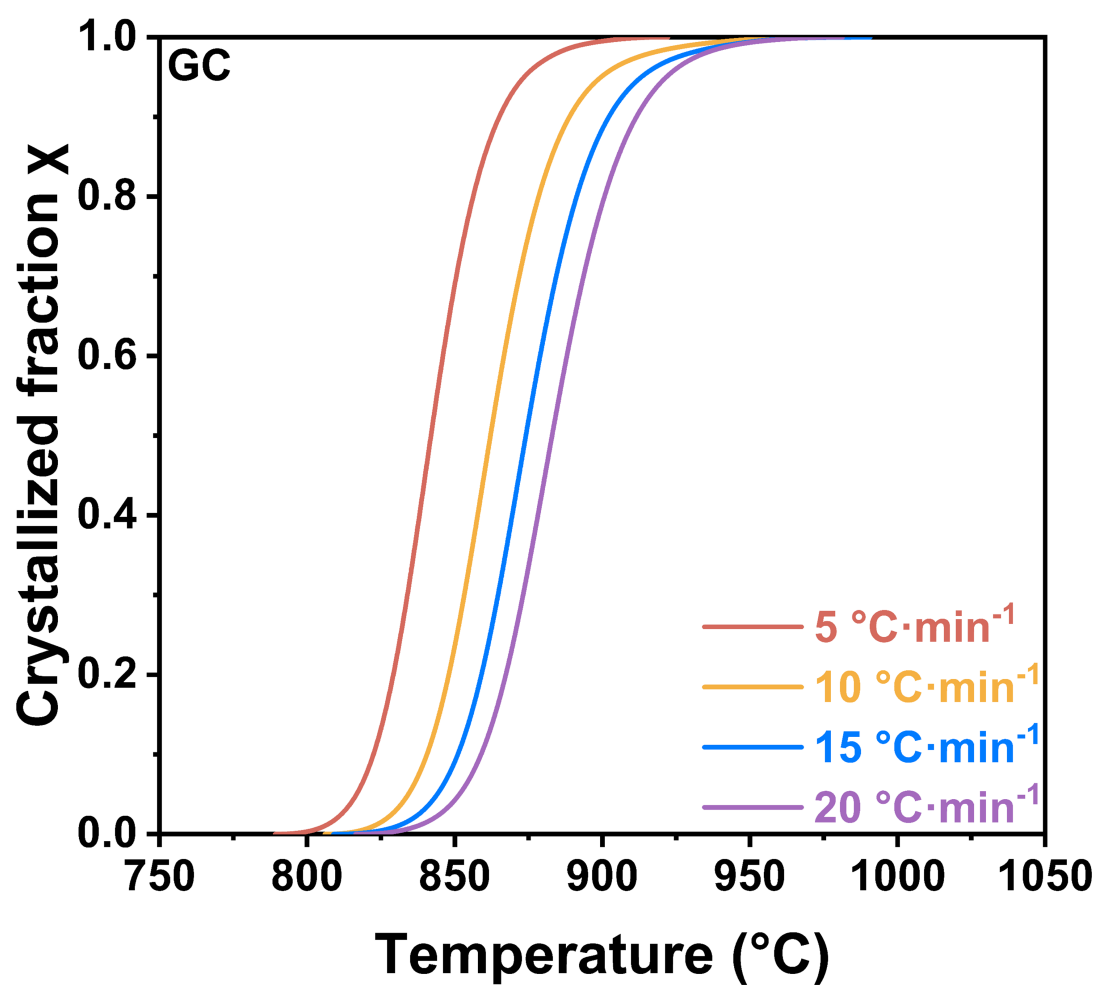

**Fig. S21** Crystallized fraction  $\chi$  as a function of temperature at different heating rates (5 °C·min<sup>-1</sup>, 10 °C·min<sup>-1</sup>, 15 °C·min<sup>-1</sup>, 20 °C·min<sup>-1</sup>) for GC.

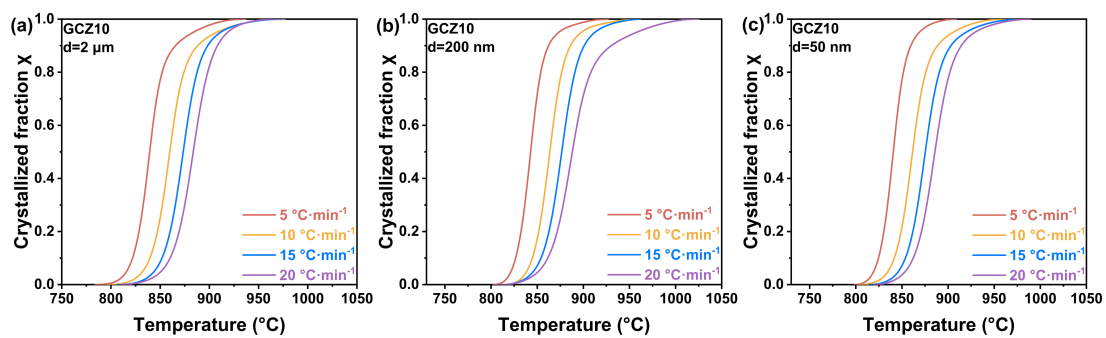

**Fig. S22** Crystallized fraction  $\chi$  as a function of temperature at different heating rates ( $5\ ^\circ\text{C}\cdot\text{min}^{-1}$ ,  $10\ ^\circ\text{C}\cdot\text{min}^{-1}$ ,  $15\ ^\circ\text{C}\cdot\text{min}^{-1}$ ,  $20\ ^\circ\text{C}\cdot\text{min}^{-1}$ ) for (a) GCZ10,  $d=2\ \mu\text{m}$ , (b) GCZ10,  $d=200\ \text{nm}$  and (c) GCZ10,  $d=50\ \text{nm}$  samples.

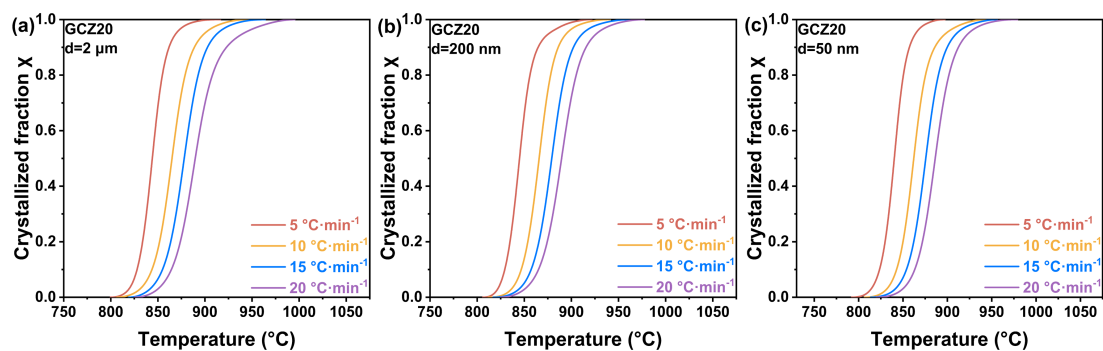

**Fig. S23** Crystallized fraction  $\chi$  as a function of temperature at different heating rates ( $5\ ^\circ\text{C}\cdot\text{min}^{-1}$ ,  $10\ ^\circ\text{C}\cdot\text{min}^{-1}$ ,  $15\ ^\circ\text{C}\cdot\text{min}^{-1}$ ,  $20\ ^\circ\text{C}\cdot\text{min}^{-1}$ ) for (a) GCZ20,  $d=2\ \mu\text{m}$ , (b) GCZ20,  $d=200\ \text{nm}$  and (c) GCZ20,  $d=50\ \text{nm}$  samples.

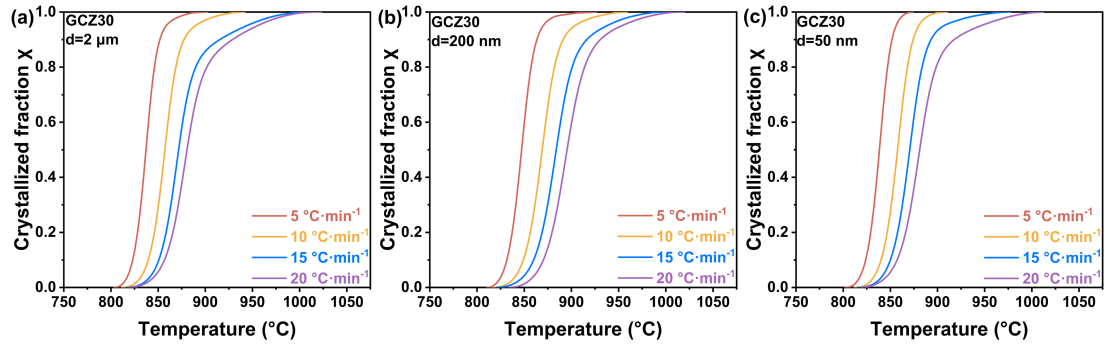

**Fig. S24** Crystallized fraction  $\chi$  as a function of temperature at different heating rates (5 °C·min<sup>-1</sup>, 10 °C·min<sup>-1</sup>, 15 °C·min<sup>-1</sup>, 20 °C·min<sup>-1</sup>) for (a) GCZ30, d=2 μm, (b) GCZ30, d=200 nm and (c) GCZ30, d=50 nm samples.

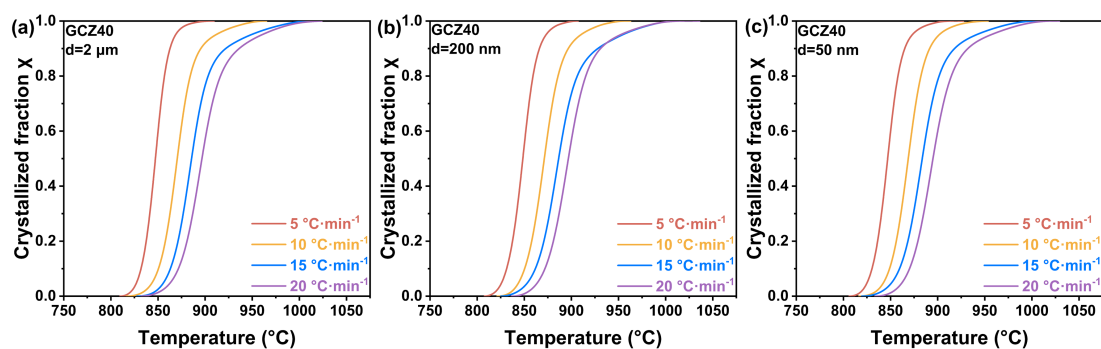

**Fig. S25** Crystallized fraction  $\chi$  as a function of temperature at different heating rates ( $5\ ^\circ\text{C}\cdot\text{min}^{-1}$ ,  $10\ ^\circ\text{C}\cdot\text{min}^{-1}$ ,  $15\ ^\circ\text{C}\cdot\text{min}^{-1}$ ,  $20\ ^\circ\text{C}\cdot\text{min}^{-1}$ ) for (a) GCZ40,  $d=2\ \mu\text{m}$ , (b) GCZ40,  $d=200\ \text{nm}$  and (c) GCZ40,  $d=50\ \text{nm}$  samples.



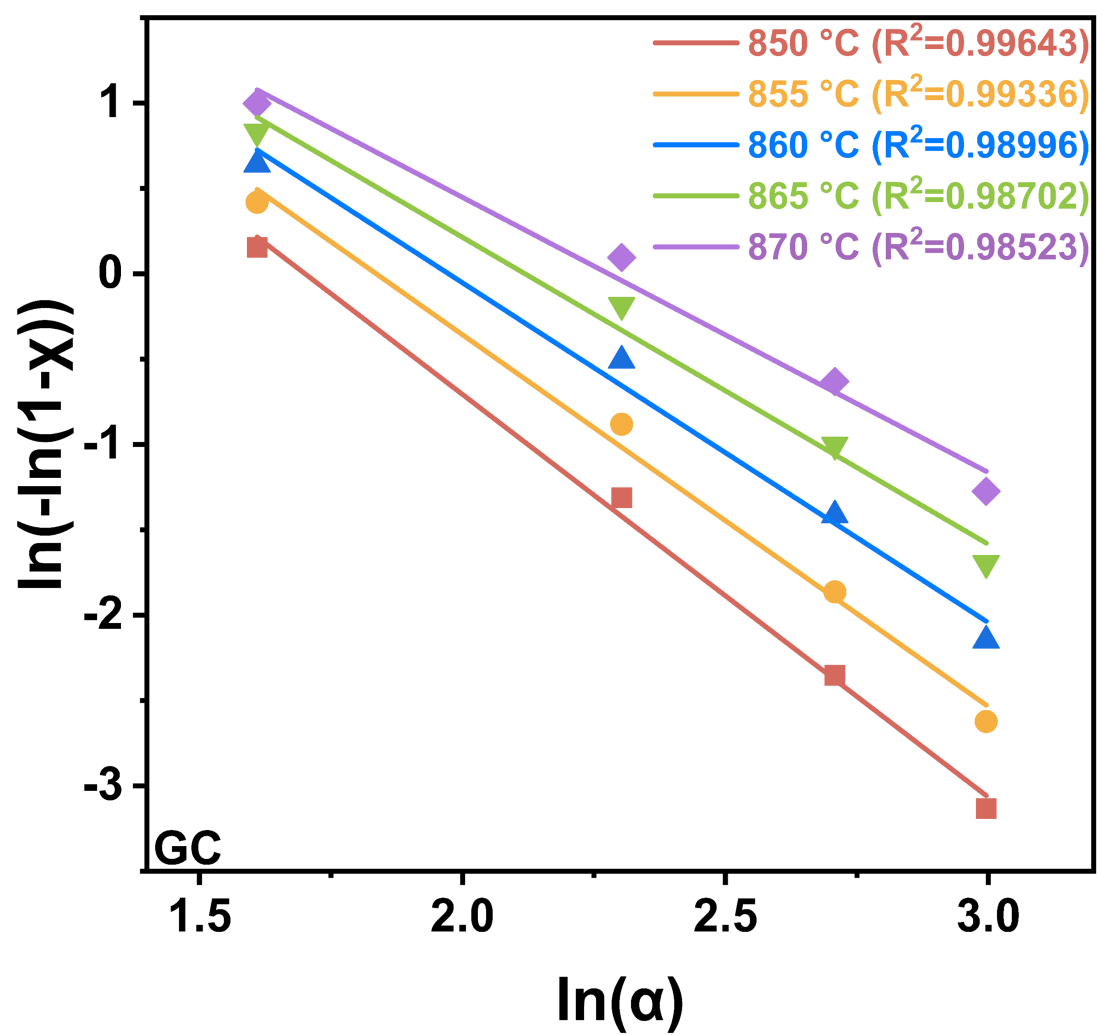

**Fig. S26** Plot of  $\ln(-\ln(1-x))$  versus  $\ln \alpha$  at fixed temperatures determined by Ozawa equation for GC.

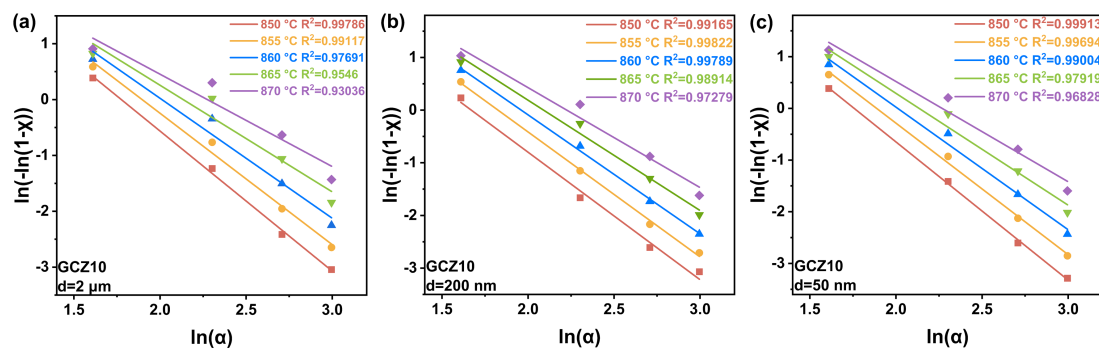

**Fig. S27** Plots of  $\ln(-\ln(1-x))$  versus  $\ln \alpha$  at fixed temperatures determined by Ozawa equation for (a) GCZ10,  $d=2 \mu\text{m}$ , (b) GCZ10,  $d=200 \text{ nm}$  and (c) GCZ10,  $d=50 \text{ nm}$  samples.

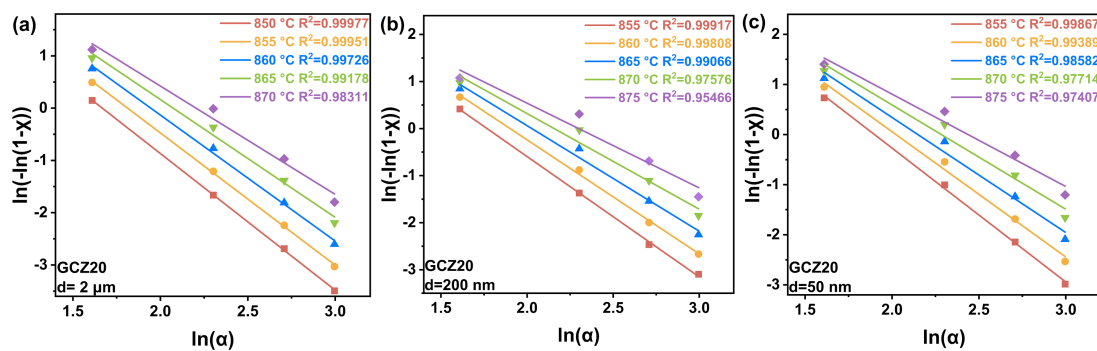

**Fig. S28** Plots of  $\ln(-\ln(1-x))$  versus  $\ln \alpha$  at fixed temperatures determined by Ozawa equation for (a) GCZ20,  $d=2 \mu\text{m}$ , (b) GCZ20,  $d=200 \text{ nm}$  and (c) GCZ20,  $d=50 \text{ nm}$  samples.

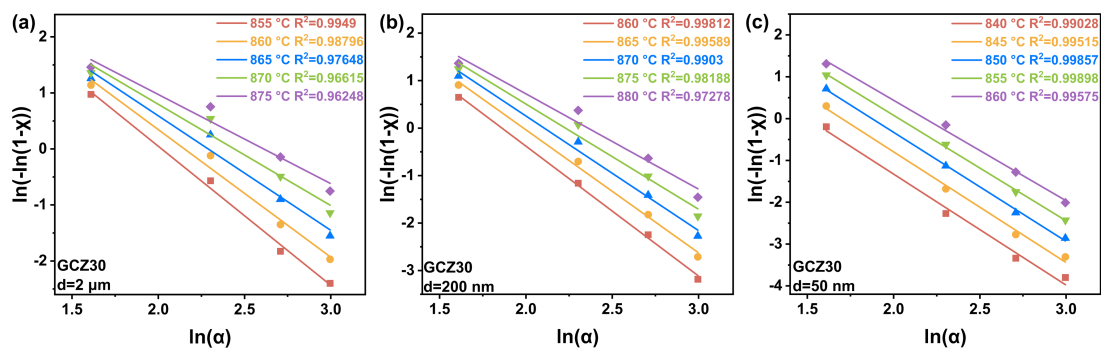

**Fig. S29** Plots of  $\ln(-\ln(1-x))$  versus  $\ln \alpha$  at fixed temperatures determined by Ozawa equation for (a) GCZ30,  $d=2\ \mu\text{m}$ , (b) GCZ30,  $d=200\ \text{nm}$  and (c) GCZ30,  $d=50\ \text{nm}$  samples.

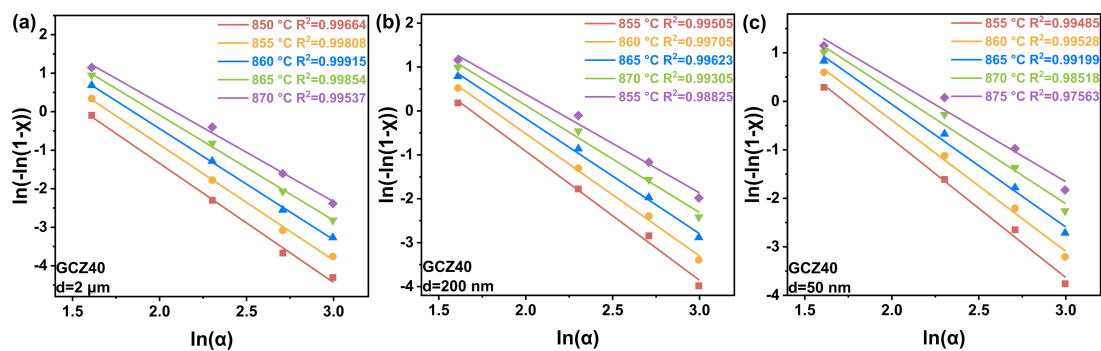

**Fig. S30** Plots of  $\ln(-\ln(1-x))$  versus  $\ln \alpha$  at fixed temperatures determined by Ozawa equation for (a) GCZ40,  $d=2\ \mu\text{m}$ , (b) GCZ40,  $d=200\ \text{nm}$  and (c) GCZ40,  $d=50\ \text{nm}$  samples.

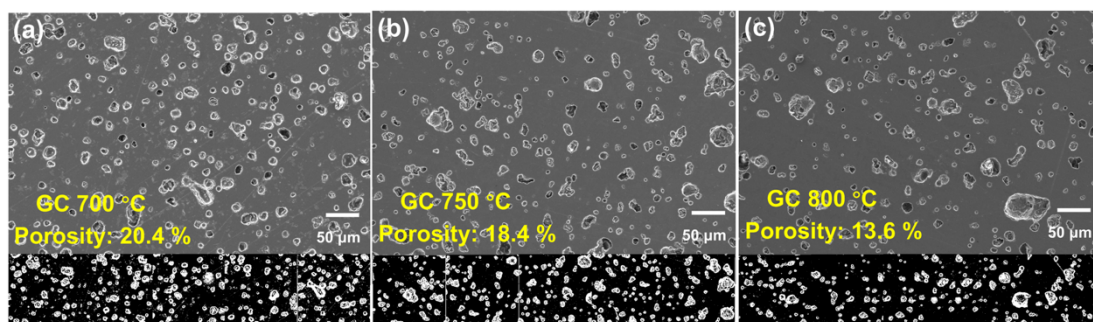

**Fig. S31** SEM micrographs and related porosity results of GC sintered at (a) 700 °C, (b) 750 °C, and (c) 800 °C for 2 hours.

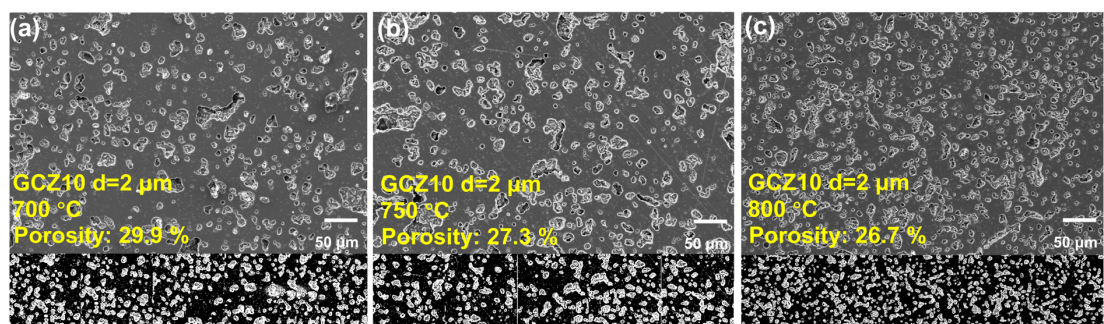

**Fig. S32** SEM micrographs and related porosity results of GCZ10,  $d=2\text{ }\mu\text{m}$  sintered at (a) 700 °C, (b) 750 °C, and (c) 800 °C for 2 hours.

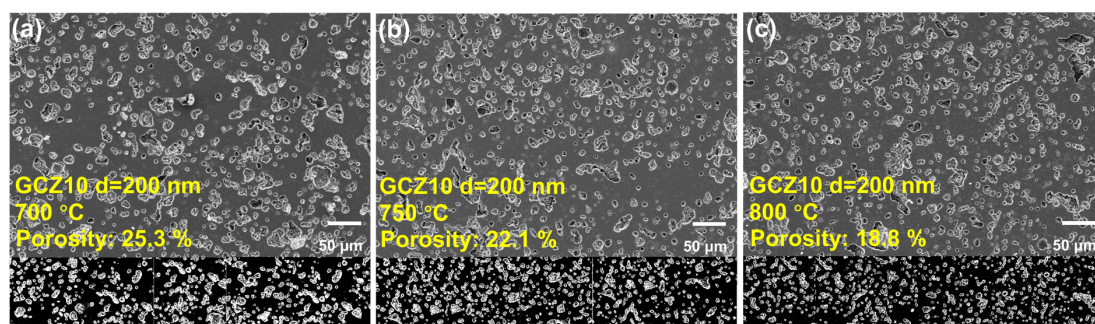

**Fig. S33** SEM micrographs and related porosity results of GCZ10, d=200 nm sintered at (a) 700 °C, (b) 750 °C, and (c) 800 °C for 2 hours.



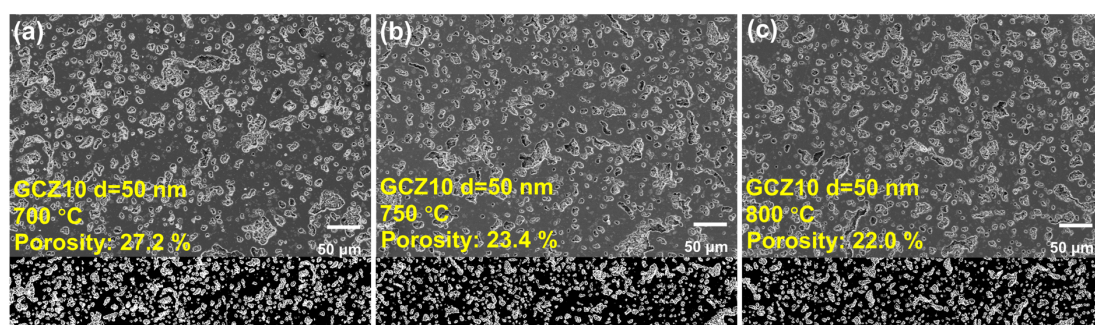

**Fig. S34** SEM micrographs and related porosity results of GCZ10, d=50 nm sintered at (a) 700 °C, (b) 750 °C, and (c) 800 °C for 2 hours.

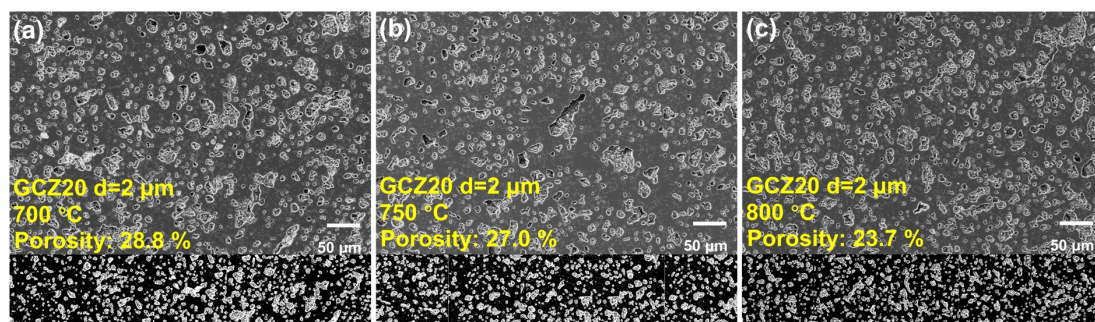

**Fig. S35** SEM micrographs and related porosity results of GCZ20,  $d=2\ \mu\text{m}$  sintered at (a) 700 °C, (b) 750 °C, and (c) 800 °C for 2 hours.

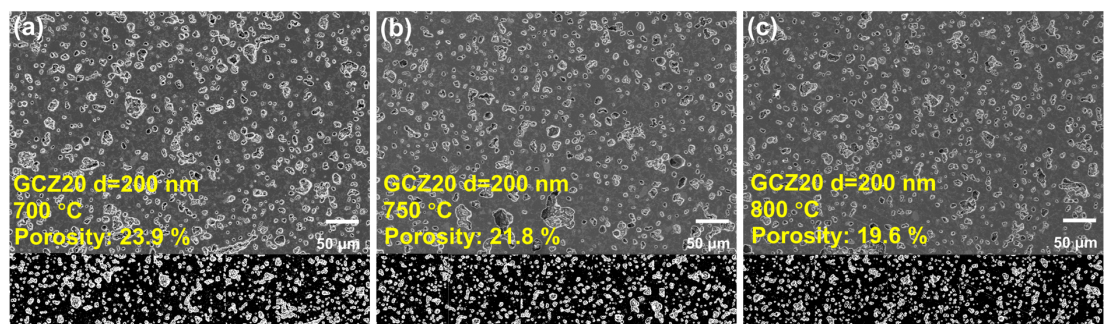

**Fig. S36** SEM micrographs and related porosity results of GCZ20, d=200 nm sintered at (a) 700 °C, (b) 750 °C, and (c) 800 °C for 2 hours.

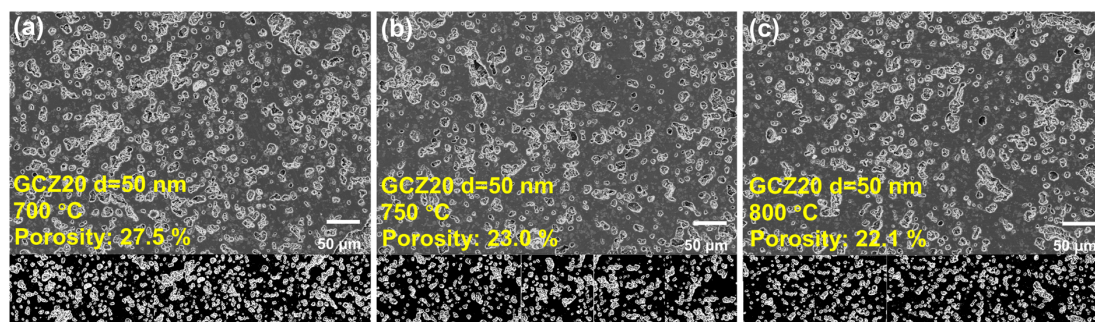

**Fig. S37** SEM micrographs and related porosity results of GCZ20, d=50 nm sintered at (a) 700 °C, (b) 750 °C, and (c) 800 °C for 2 hours.

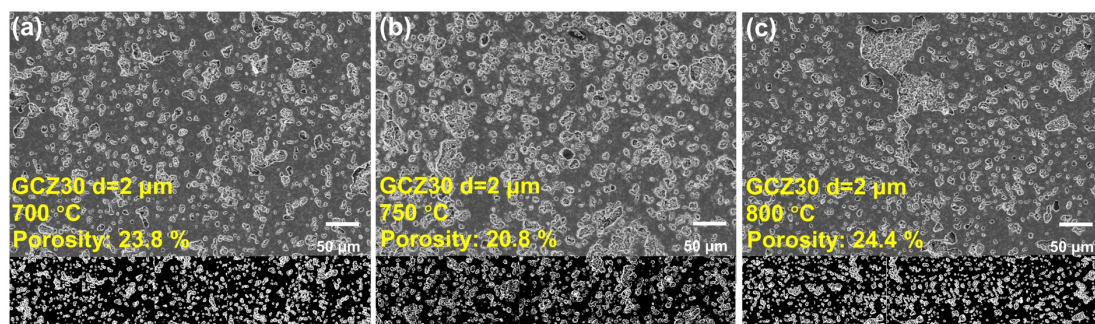

**Fig. S38** SEM micrographs and related porosity results of GCZ30,  $d=2\text{ }\mu\text{m}$  sintered at (a) 700 °C, (b) 750 °C, and (c) 800 °C for 2 hours.



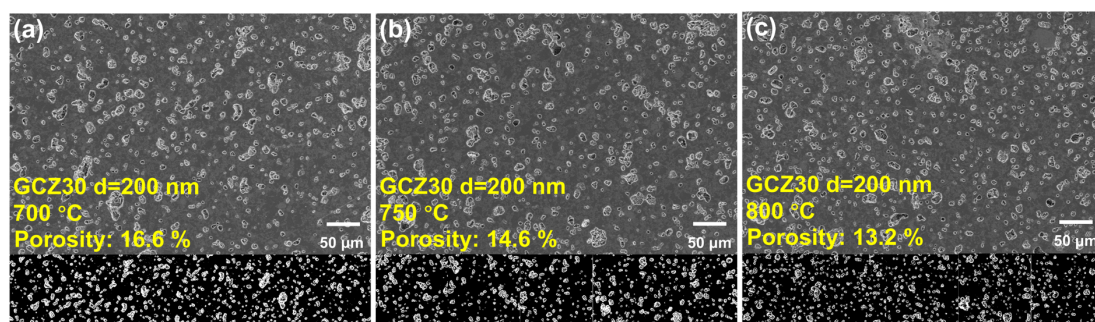

**Fig. S39** SEM micrographs and related porosity results of GCZ30, d=200 nm sintered at (a) 700 °C, (b) 750 °C, and (c) 800 °C for 2 hours.

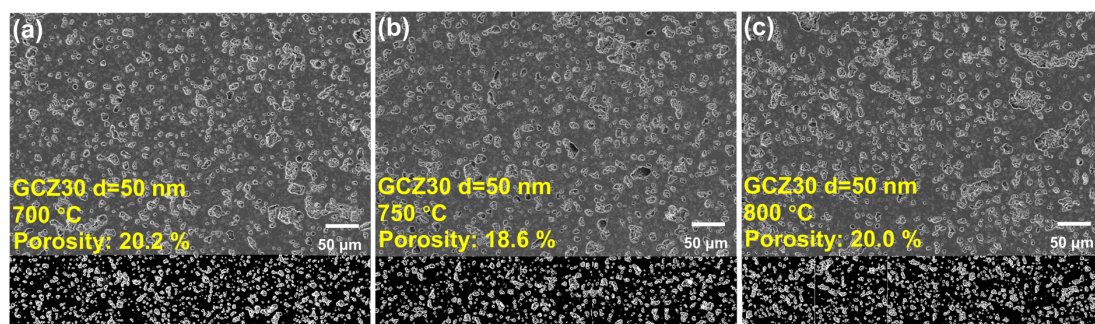

**Fig. S40** SEM micrographs and related porosity results of GCZ30,  $d=50$  nm sintered at (a) 700 °C, (b) 750 °C, and (c) 800 °C for 2 hours.

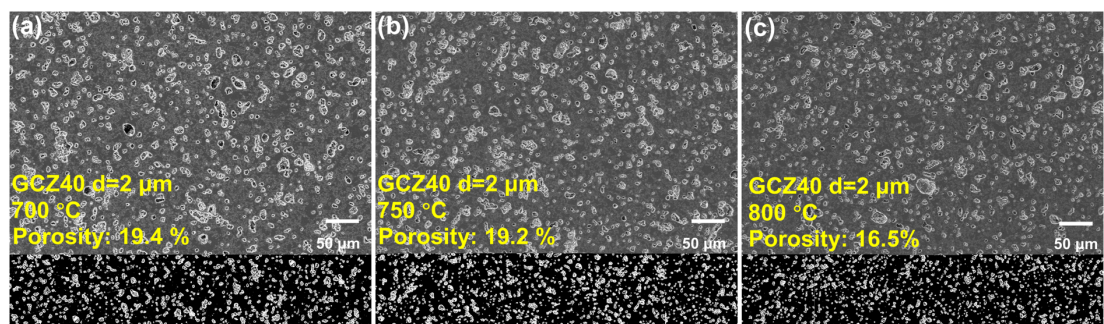

**Fig. S41** SEM micrographs and related porosity results of GCZ40,  $d=2\text{ }\mu\text{m}$  sintered at (a) 700 °C, (b) 750 °C, and (c) 800 °C for 2 hours.



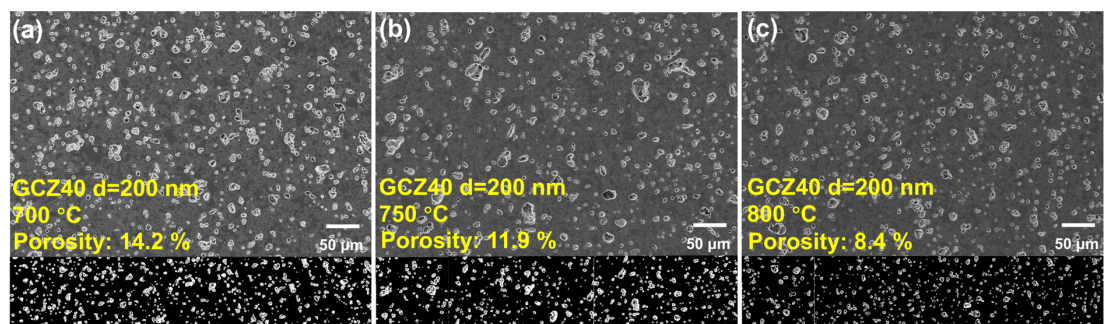

**Fig. S42** SEM micrographs and related porosity results of GCZ40, d=200 nm sintered at (a) 700 °C, (b) 750 °C, and (c) 800 °C for 2 hours.

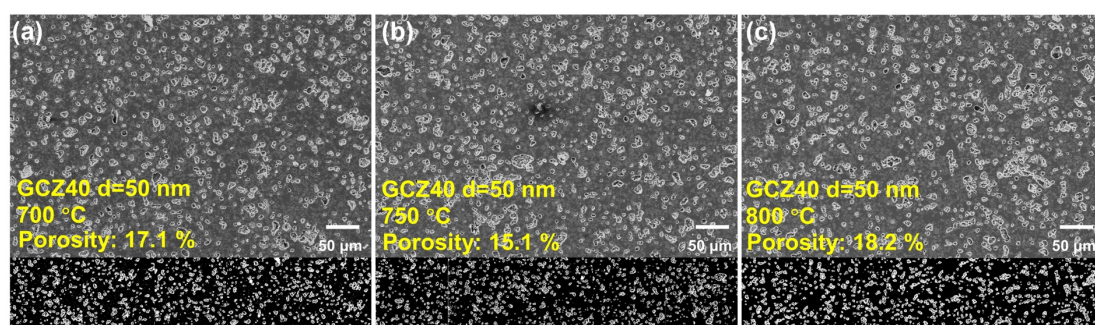

**Fig. S43** SEM micrographs and related porosity results of GCZ40, d=50 nm sintered at (a) 700 °C, (b) 750 °C, and (c) 800 °C for 2 hours.

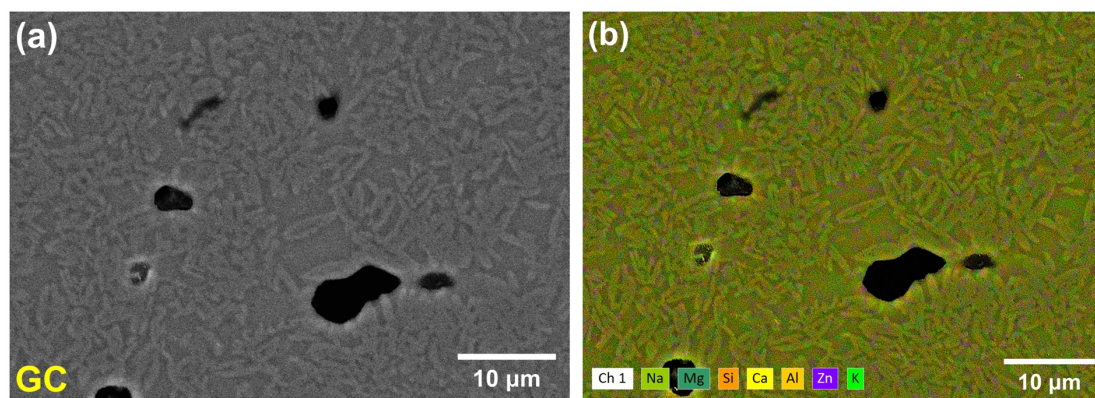

**Fig. S44** (a) Backscattered SEM micrograph and (b) elemental distribution (EDS mapping) of GC after heat treatment at 850 °C for 4 hours.

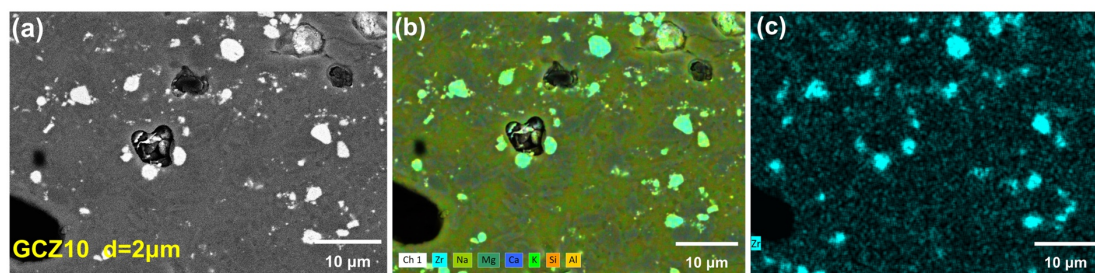

**Fig. S45** (a) Backscattered SEM micrograph, (b) elemental distribution (EDS mapping) and (c) distribution of zirconium of GCZ10,  $d=2\ \mu\text{m}$  after heat treatment at 850 °C for 4 hours.

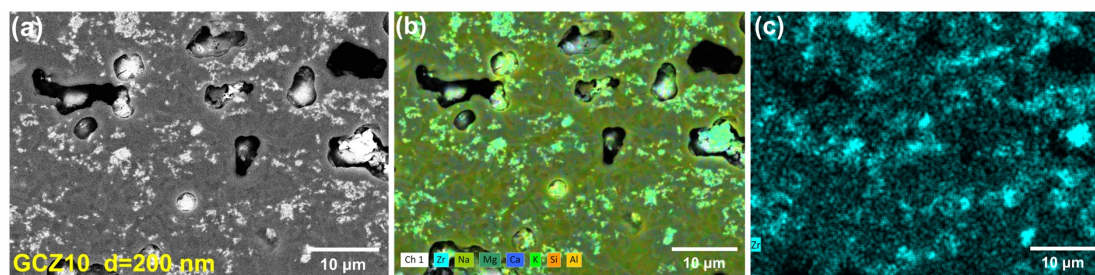

**Fig. S46** (a) Backscattered SEM micrograph, (b) elemental distribution (EDS mapping) and (c) distribution of zirconium of GCZ10, d=200 nm after heat treatment at 850 °C for 4 hours.

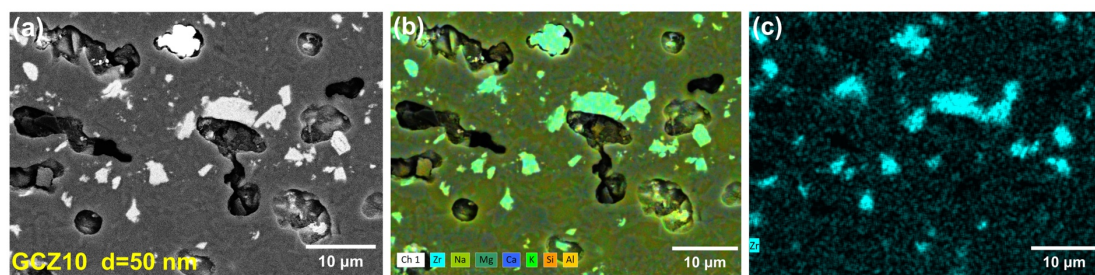

**Fig. S47** (a) Backscattered SEM micrograph, (b) elemental distribution (EDS mapping) and (c) distribution of zirconium of GCZ10, d=50 nm after heat treatment at 850 °C for 4 hours.



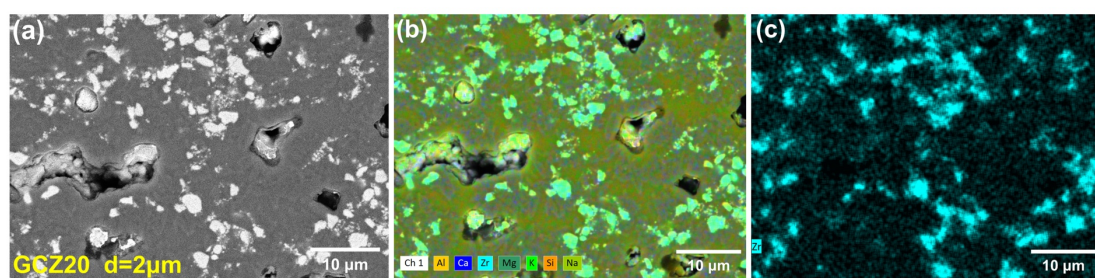

**Fig. S48** (a) Backscattered SEM micrograph, (b) elemental distribution (EDS mapping) and (c) distribution of zirconium of GCZ20, d=2μm after heat treatment at 850 °C for 4 hours.

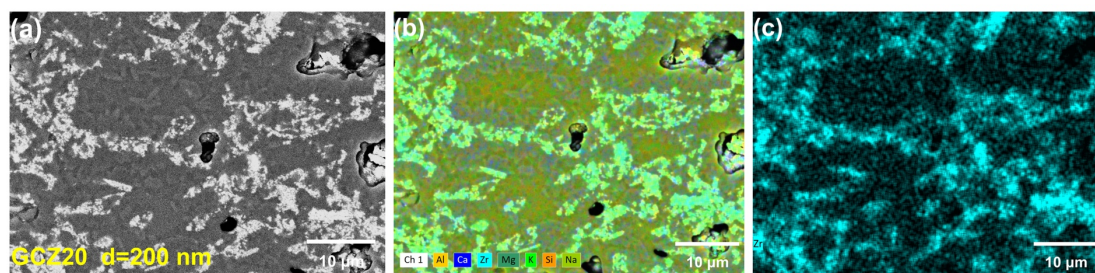

**Fig. S49** (a) Backscattered SEM micrograph, (b) elemental distribution (EDS mapping) and (c) distribution of zirconium of GCZ20, d=200 nm after heat treatment at 850 °C for 4 hours.



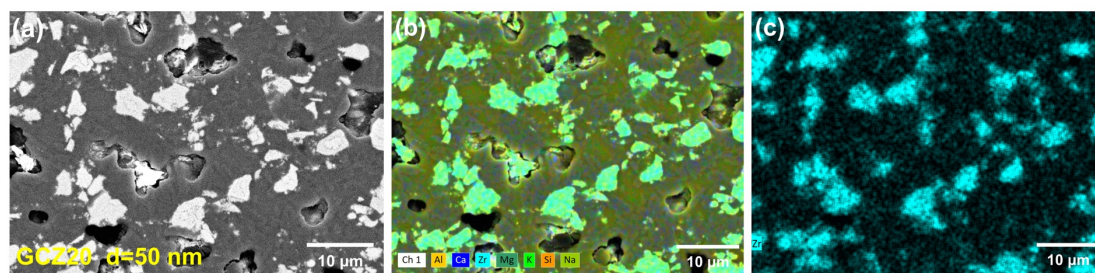

**Fig. S50** (a) Backscattered SEM micrograph, (b) elemental distribution (EDS mapping) and (c) distribution of zirconium of GCZ20, d=50 nm after heat treatment at 850 °C for 4 hours.

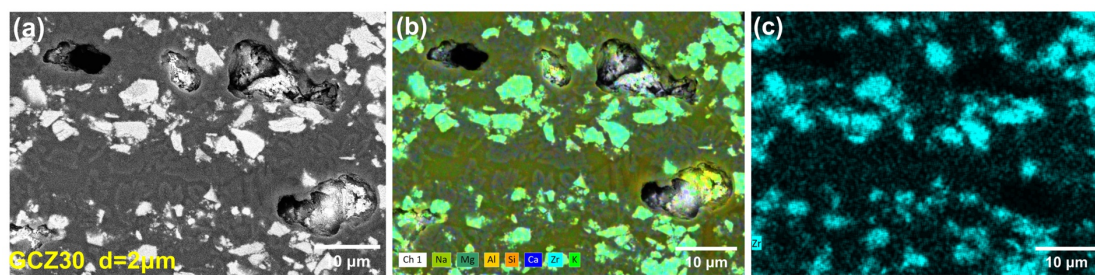

**Fig. S51** (a) Backscattered SEM micrograph, (b) elemental distribution (EDS mapping) and (c) distribution of zirconium of GCZ30,  $d=2\text{ }\mu\text{m}$  after heat treatment at  $850\text{ }^{\circ}\text{C}$  for 4 hours.

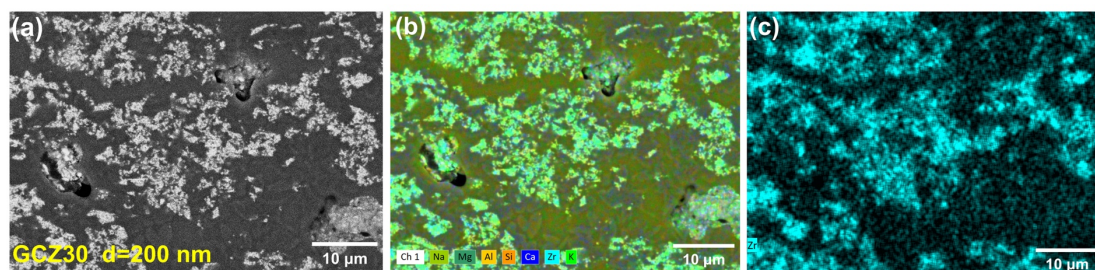

**Fig. S52** (a) Backscattered SEM micrograph, (b) elemental distribution (EDS mapping) and (c) distribution of zirconium of GCZ30, d=200 nm after heat treatment at 850 °C for 4 hours.

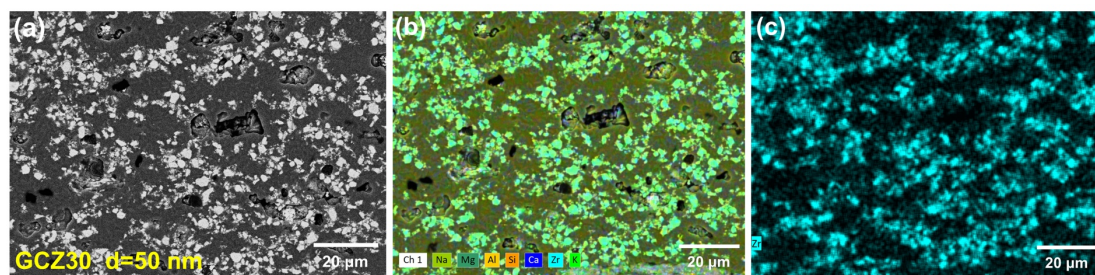

**Fig. S53** (a) Backscattered SEM micrograph, (b) elemental distribution (EDS mapping) and (c) distribution of zirconium of GCZ30, d=50 nm after heat treatment at 850 °C for 4 hours.

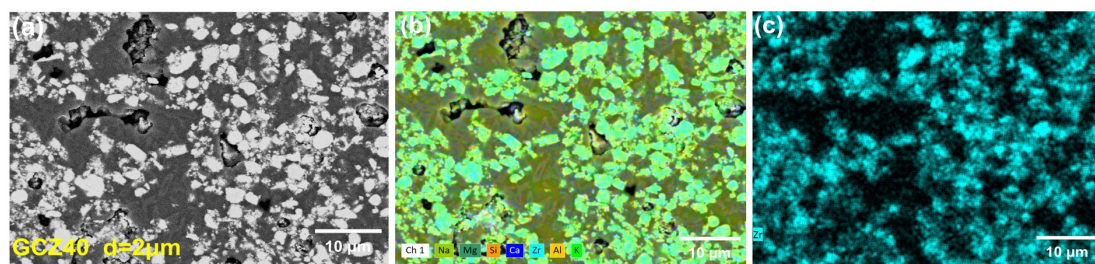

**Fig. S54** (a) Backscattered SEM micrograph, (b) elemental distribution (EDS mapping) and (c) distribution of zirconium of GCZ40, d=2 µm after heat treatment at 850 °C for 4 hours.

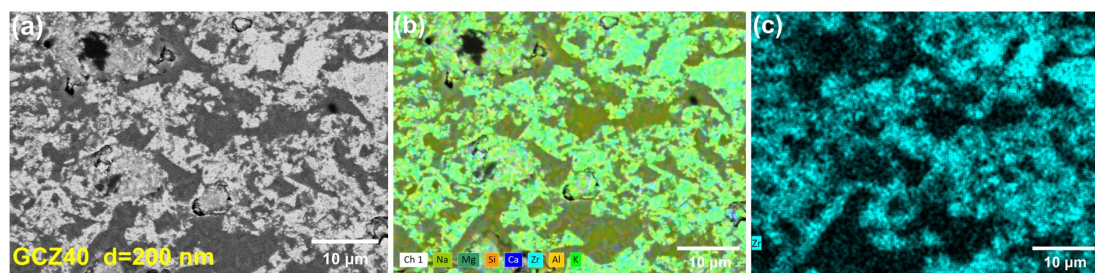

**Fig. S55.** (a) Backscattered SEM micrograph, (b) elemental distribution (EDS mapping) and (c) distribution of zirconium of GCZ40, d=200 nm after heat treatment at 850 °C for 4 hours.



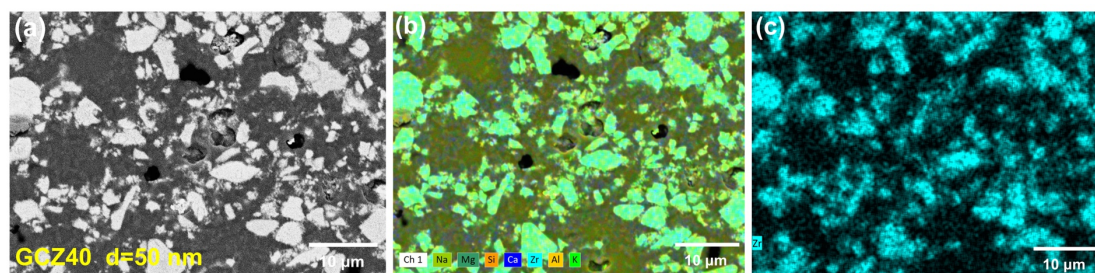

**Fig. S56** (a) Backscattered SEM micrograph, (b) elemental distribution (EDS mapping) and (c) distribution of zirconium of GCZ40, d=50 nm after heat treatment at 850 °C for 4 hours.

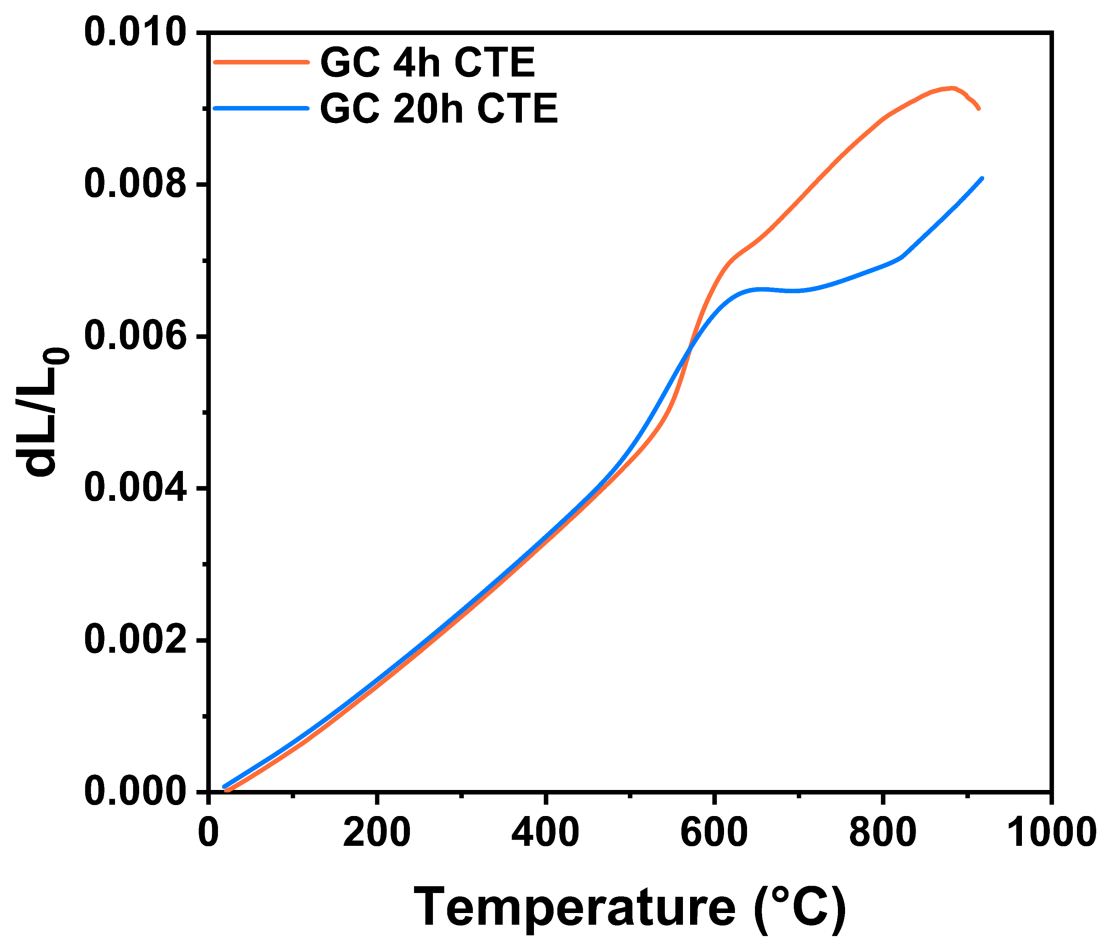

**Fig. S57** Dilatometric thermograph of 4h and 20h heat-treated GC samples.



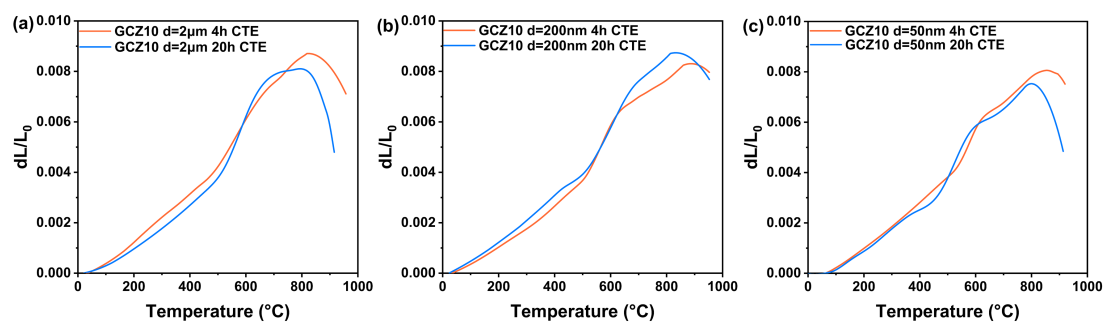

**Fig. S58** Dilatometric thermograph of 4h and 20h heat-treated (a) GCZ10,  $d=2\ \mu\text{m}$ , (b) GCZ10,  $d=200\ \text{nm}$  and (c) GCZ10,  $d=50\ \text{nm}$  samples.

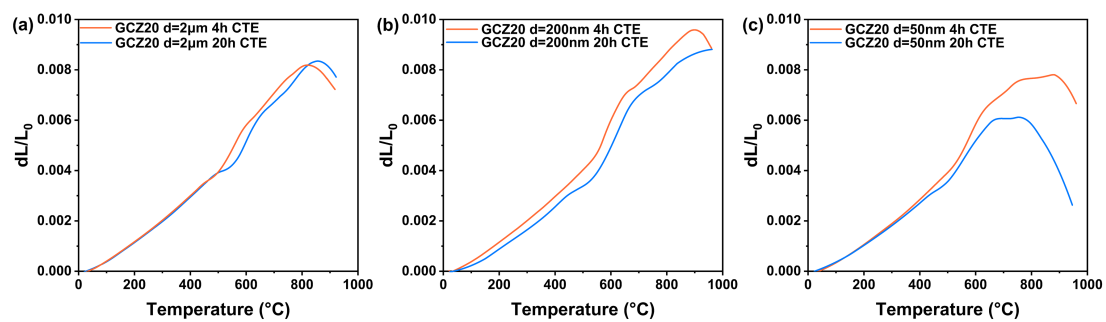

**Fig. S59** Dilatometric thermograph of 4h and 20h heat-treated (a) GCZ20,  $d=2\text{ }\mu\text{m}$ , (b) GCZ20,  $d=200\text{ nm}$  and (c) GCZ20,  $d=50\text{ nm}$  samples.

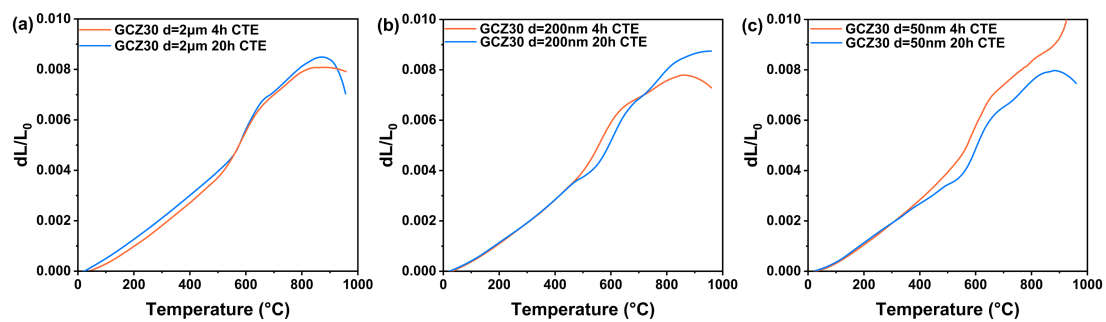

**Fig. S60** Dilatometric thermograph of 4h and 20h heat-treated (a) GCZ30,  $d=2\text{ }\mu\text{m}$ , (b) GCZ30,  $d=200\text{ nm}$  and (c) GCZ30,  $d=50\text{ nm}$  samples.

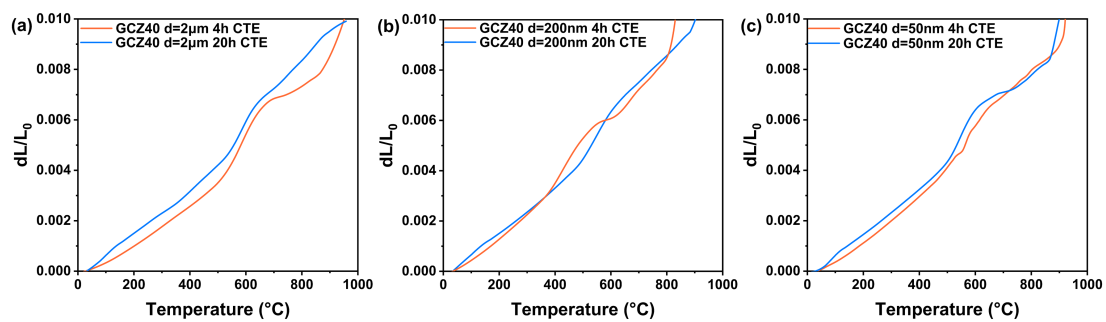

**Fig. S61** Dilatometric thermograph of 4h and 20h heat-treated (a) GCZ40,  $d=2\text{ }\mu\text{m}$ , (b) GCZ40,  $d=200\text{ nm}$  and (c) GCZ40,  $d=50\text{ nm}$  samples.

**Table S1** The content of each component of GC glass (elements concentration %)

| <b>Components</b> | <b>SiO<sub>2</sub></b> | <b>CaO</b> | <b>ZnO</b> | <b>MgO</b> | <b>Na<sub>2</sub>O</b> | <b>Al<sub>2</sub>O<sub>3</sub></b> | <b>SrO</b> | <b>K<sub>2</sub>O</b> | <b>TiO<sub>2</sub></b> | <b>ZrO<sub>2</sub></b> |
|-------------------|------------------------|------------|------------|------------|------------------------|------------------------------------|------------|-----------------------|------------------------|------------------------|
| <b>GC</b>         | 52.4                   | 15.1       | 9.5        | 7.6        | 5.6                    | 3.4                                | 2.6        | 1.9                   | 1.2                    | 0.6                    |
